# 1 **An Autophagy-Dependent Tubular Lysosomal Network** 2 **Synchronizes Degradative Activity Required for Muscle Remodeling**

3  
4 Tadayoshi Murakawa<sup>1,2</sup>, Amy A. Kiger<sup>3</sup>, Yuriko Sakamaki<sup>4</sup>, Mitsunori Fukuda<sup>2</sup>, and  
5 Naonobu Fujita<sup>1,5,\*</sup>

6  
7 <sup>1</sup> Cell Biology Center, Institute of Innovative Research, Tokyo Institute of Technology,  
8 4259-S2-11 Nagatsuta-cho, Midori-ku, Yokohama, Kanagawa 226-8503, Japan.

9 <sup>2</sup> Laboratory of Membrane Trafficking Mechanisms, Department of Integrative Life  
10 Sciences, Graduate School of Life Sciences, Tohoku University, Aoba-ku, Sendai,  
11 Miyagi 980-8578, Japan.

12 <sup>3</sup> Section of Cell and Developmental Biology, Division of Biological Sciences,  
13 University of California, San Diego, La Jolla, CA, 92093, USA.

14 <sup>4</sup> Microscopy Research Support Unit Research Core, Tokyo Medical and Dental  
15 University, Tokyo, 113-8510, Japan.

16 <sup>5</sup> Precursory Research for Embryonic Science & Technology (PRESTO), Japan Science  
17 & Technology Agency (JST), 4-1-8 Honcho Kawaguchi, Saitama, 332-0012, Japan.

18  
19 \* Corresponding author. Tel: +81 45 924 5131; E-mail: [nafujita@bio.titech.ac.jp](mailto:nafujita@bio.titech.ac.jp)

20  
21 **Keywords:** autophagy, muscle, tubular lysosome, autolysosome, Drosophila,  
22 metamorphosis, myofiber, atrophy, Syntaxin17

23  
24 **Abbreviations used:** ALR, autophagic lysosome reformation; APF, after puparium  
25 formation; ATG, autophagy-related; Cp1, cysteine protease 1; DIOM, dorsal internal  
26 oblique muscle; DQ, dye quenched; FRAP, fluorescence recovery after photobleaching;  
27 mTOR, mechanistic target of rapamycin; SNARE, soluble NSF attachment protein  
28 receptor; Stx17, Syntaxin17; tAL, tubular autolysosome; TEM, transmission electron  
29 microscopy; V-ATPase, vacuolar H<sup>+</sup> ATPase; 3IL, third instar larvae.

## 30 31 **Impact Statement**

32 Analysis of developmentally-regulated Drosophila muscle remodeling revealed  
33 autophagy-dependent formation of an extensive, Syntaxin 17-marked, tubular network  
34 that synchronizes the abundant degradative activity across a broad region of the  
35 remodeling muscle

36

1 **Abstract**

2

3 Previously, we reported that autophagy is critical for *Drosophila* muscle remodeling  
4 during metamorphosis (Fujita et al., 2017). However, little is known about how  
5 lysosomes meet increased degradative demand upon cellular remodeling. Here, we  
6 found an extensive tubular autolysosomal network in remodeling muscle. The tubular  
7 network transiently appeared and exhibited the capacity to degrade autophagic cargoes.  
8 The tubular autolysosomal network was uniquely marked by the autophagic SNARE  
9 protein, Syntaxin 17, and its formation depended on both autophagic flux and  
10 degradative function, with the exception of the Atg12 and Atg8 ubiquitin-like  
11 conjugation systems. Among *ATG*-deficient mutants, the efficiency of lysosomal  
12 tubulation correlated with the phenotypic severity in muscle remodeling. The lumen of  
13 the tubular network was continuous and homogeneous across a broad region of the  
14 remodeling muscle. Altogether, we revealed that the dynamic expansion of a tubular  
15 autolysosomal network synchronizes the abundant degradative activity required for  
16 developmentally regulated muscle remodeling.

## 1 **Introduction**

2

3 Lysosomes are membrane-bound compartments for the degradation of both endocytic  
4 and autophagic cargoes in the eukaryotic cell. The lumen of lysosomes maintains an  
5 acidic pH to digest materials by a series of acid hydrolases (Lawrence and Zoncu,  
6 2019). In addition to the catabolic function, lysosomes play numerous roles, such as  
7 secretion, nutrient sensing, and signaling through mechanistic target of rapamycin  
8 (mTOR) complex I and AMP-activated protein kinase (AMPK). Thus, the regulation of  
9 lysosomal function is critical for cellular homeostasis. The MiT/TFE family of  
10 transcription factors, including TFEB and TFE3, are master regulators of the expression  
11 of a myriad of lysosomal and autophagic functions needed to meet changing  
12 degradative demands (Martina et al., 2014; Sardiello et al., 2009). However, very little  
13 is known about the mechanisms that mediate the modulation of lysosomal degradative  
14 capacity through coordinated changes in activity, quantity, distribution, and morphology  
15 (Hipolito et al., 2018).

16           Although lysosomes are generally thought of as spherical organelles,  
17 lysosomal shape undergoes morphological changes in response to certain conditions.  
18 The existence of tubulated lysosomes, called tubular lysosomes or nematolysosomes,  
19 have been known since the 1970s in various cell types, including macrophages,  
20 pancreatic exocrine cells, neurons, and muscle cells (Knapp and Swanson, 1990;  
21 Swanson et al., 1987; Okada et al., 1986; Robinson et al., 1986; Shi et al., 1992; Araki  
22 et al., 1993; Oliver, 1980). Tubulated lysosomes are prominent in lipopolysaccharide  
23 (LPS)-activated macrophages and dendritic cells (Hipolito et al., 2018). Recently, the  
24 tubular lysosomal network was described in the fly larval body wall muscle (Johnson et  
25 al., 2015) and the nematode epidermis during molting (Miao et al., 2020). In general,  
26 the extended tubular lysosomes exhibited features of typical functional lysosomes,  
27 including the accumulation of acid phosphatases, lysosomal proteases, Lamp, and  
28 vacuolar H<sup>+</sup>-ATPase (V-ATPase). Microtubules may template the tubulation. In the  
29 model, plus-end-directed kinesin motors and minus-end-directed dynein-dynactin  
30 complexes extend lysosomal tubules in opposite directions via functions of the Arl8b-  
31 SKIP complex and Rab7-RILP or -FYCO1 complex, respectively (Mrakovic et al.,  
32 2012). However, the stretching model alone cannot explain how the tubular lysosome  
33 becomes over 10  $\mu$ m in length. To date, the mechanisms shaping tubular lysosomes are

1 poorly understood, and the physiological significance of the tubulation remains  
2 enigmatic.

3           Autophagy is an intracellular bulk degradation system in which double  
4 membrane-bound autophagosomes sequester and deliver cytosolic materials to the  
5 lysosomes/vacuoles for degradation. Autophagosome formation is mediated by at least  
6 18 core autophagy-related (Atg) proteins acting within six functional units (Mizushima  
7 et al., 2011): 1) the ULK/Atg1 protein kinase complex; 2) the autophagy-specific  
8 phosphatidylinositol 3-kinase (PI3K) complex; 3) the phosphatidylinositol 3-phosphate  
9 (PI3P)-binding protein complex; 4) Atg9; 5) the LC3/Atg8 conjugation system; and 6)  
10 the Atg12 conjugation system. All six units are pivotal for autophagy. However, the  
11 Atg8 and Atg12 ubiquitin-like conjugation systems seem to be dispensable for the  
12 elongation of the autophagic membrane in mammalian cells (Tsuboyama et al., 2016).  
13 The completed autophagosomes then fuse with lysosomes to form autolysosomes, the  
14 site for autophagic degradation and subsequent macromolecule efflux. The fusion is  
15 mediated by two soluble NSF attachment protein receptor (SNARE) complexes,  
16 Syntaxin17 (Qa)-SNAP29 (Qbc)-VAMP8 (R) and Syntaxin7 (Qa)-SNAP29 (Qbc)-Ykt6  
17 (R), (Itakura et al., 2012; Takáts et al., 2013; Matsui et al., 2018; Takáts et al., 2018). It  
18 has been reported that autolysosomes tubulate in the process of lysosome reformation  
19 from the autolysosome, called autophagic lysosome reformation (ALR) (Yu et al.,  
20 2010). The ALR tubule seems to be a kind of tubular lysosome; however, the tubule is  
21 neither acidic nor contains acidic hydrolases. Accordingly, it is thought of as a proto-  
22 lysosome (Yu et al., 2010).

23           Differentiated muscle cells, or myofibers, have highly organized and  
24 specialized organelles needed for muscle contraction. The contractile system is made up  
25 from sarcomeres arrayed into myofibrils. Sarcomere contractions are coordinated by  
26 changing levels of cytoplasmic calcium in response to a signal relay along the  
27 ‘excitation-contraction coupling’ system: transverse (T)-tubule invaginations of the  
28 plasma membrane in junctions with the sarcoplasmic reticulum. Mechanisms must  
29 remodel these organelles with ongoing muscle reorganization in response to muscle cell  
30 growth, use, damage, atrophy and aging. However, the mechanisms of muscle  
31 remodeling remain mostly unknown, in part due to challenges with observing the  
32 organellar dynamics within intact muscles. In *Drosophila*, a set of larval body wall  
33 muscles persist throughout metamorphosis as pupal abdominal muscles, called dorsal

1 internal oblique muscles (DIOMs). In the DIOMs, the entire contractile and excitation-  
2 contraction coupling systems undergo a developmentally-programmed remodeling  
3 during metamorphosis (Fujita et al., 2017), providing an excellent experimental model  
4 to study mechanisms of synchronous muscle atrophy to hypertrophy (Kuleesha et al.,  
5 2016). We recently reported that autophagy plays a critical role in DIOM remodeling  
6 (Fujita et al., 2017). Upon disassembly of myofiber organization in DIOMs, the  
7 cytoplasmic contents including mitochondria were enwrapped by autophagic  
8 membranes and delivered into lysosomes for degradation. In the process, not only  
9 autophagosome formation but also lysosomal functions must be regulated. However,  
10 little is known about the mechanisms that coordinate lysosomal function with cellular  
11 remodeling.

12           Here, we found an extensive, tubular autolysosomal (tAL) network in  
13 *Drosophila* muscles during metamorphosis. The induction of autophagy with muscle  
14 remodeling was necessary for autolysosomal tubulation, which was uniquely marked by  
15 the autophagy-related SNARE, Syntaxin 17 (Stx17). The tubular network was  
16 continuous with a homogeneous lumen, and the tAL network extended over a wider  
17 range of the remodeling muscle cell than were spherical lysosomes found in the stable  
18 myofibers prior to remodeling. We show that the tubular autolysosomal network acts to  
19 synchronize activity and meet increased degradative demand with muscle remodeling.

20

## 1 **Results**

2

### 3 **Syntaxin 17 marks aa tubular network in remodeling muscle cells**

4 To gain insight into organelle dynamics with muscle remodeling during metamorphosis  
5 (Figure 1A–B), the localizations of GFP-tagged reporters for different cellular  
6 membrane compartments were observed every day after pupal formation (APF) in intact  
7 abdominal DIOMs. At the third instar larval (3IL) stage, GFP-fused Stx17, a marker of  
8 autophagic membranes in differentiated muscle (Fujita et al., 2017), was detected as  
9 previously described as vesicular structures. Strikingly, upon metamorphosis we found  
10 that GFP:Stx17 appeared as a tubular network present in all DIOMs by 1 d APF (Figure  
11 1C). Thereafter, the extent of tubulation gradually decreased, and a GFP:Stx17 vesicular  
12 pattern was restored by 3 d APF (Figure 1C). To observe how the network developed,  
13 we performed time-course microscopy. GFP:Stx17 remained in puncta at 12 h APF,  
14 then became increasingly tubulated until 16–20 h APF (Figure 1D–E), indicating a  
15 dynamic rearrangement of GFP:Stx17-labeled membranes with the onset of DIOM  
16 muscle remodeling (Fujita et al., 2017).

17

### 18 **The Syntaxin 17 tubular network has characteristics of autolysosomes**

19 Stx17, a SNARE protein, localizes to the autophagosome and detaches just after fusion  
20 with the lysosome (Itakura et al., 2012; Takáts et al., 2013). We have reported that  
21 autophagy is robustly induced with DIOM remodeling by 1 d APF (Fujita et al., 2017).  
22 Therefore, we postulated that the tubular network was an autophagy-related structure.  
23 To test the possibility, we performed time-course microscopy of autophagic flux over  
24 DIOM remodeling. Using the mCherry:GFP:Atg8 reporter, autophagosomes and  
25 autolysosomes can be distinguished by GFP-sensitivity to low pH (Kimura et al., 2007).  
26 While the mCherry:GFP:Atg8 signal in the GFP channel did not exhibit any tubular  
27 structures, the mCherry was distributed to highly tubulated structures (Figure 2A) that  
28 colocalized with GFP:Stx17 (Figure 2B) in 1 d APF DIOMs. This result indicates that  
29 the Stx17-positive tubular network is an autolysosome-related organelle.

30 We characterized the tubular compartment further. GFP:Stx17-positive  
31 tubular structures colocalized with two lysosomal proteins, Spinster, a lysosomal sugar  
32 transporter (Spin:RFP), and the cathepsin L cysteine protease (Cp1:mKO), but not with  
33 F-actin sarcomeres (Lifeact:Ruby) (Figure 2C). Moreover, compartmental acidification

1 and degradative activity — including throughout the tubules — was indicated by  
2 GFP:Stx17 colocalization with LysoTracker Red, a dye for acidic organelles, and dye-  
3 quenched (DQ) Red-BSA, a fluorogenic substrate for proteases, respectively (Figure  
4 2D–E). The autolysosomal activity seen within the GFP:Stx17-positive tubules  
5 contrasts the lack of activity described for tubules involved in autophagic lysosomal  
6 reformation (ALR) (Yu et al., 2010; Chen and Yu, 2013). To determine whether the  
7 autolysosomal tubules have a capacity to receive and degrade transported materials, we  
8 performed live imaging of autophagosomes (GFP:Atg8) and the autolysosome network  
9 (Spin:RFP), respectively. We observed initially bright GFP:Atg8 puncta that, over a few  
10 minutes, quenched at the site of Spin:RFP-positive tubules (Figure 2F, Figure 2—figure  
11 supplement 1, and Supplementary video 1). Concomitant with quenching of GFP:Atg8,  
12 the shape of the Spin:RFP-positive tubule was transiently distended, indicating  
13 autophagosome fusion with the tubule. We noticed that signal from GFP:Atg8 puncta  
14 disappeared near tubules in most cases. Collectively, the distances between GFP:Atg8  
15 puncta to the nearest Spin:RFP tubule was significantly lower than that for randomly  
16 simulated puncta (Figure 2G), suggesting that autophagosomes are delivered to and  
17 degraded in tubules of the tAL network.

18 Altogether, we identified a distinct and highly tubulated autolysosomal  
19 compartment that expands with muscle remodeling. This tubulated autolysosome is  
20 uniquely marked by Stx17 and exhibits degradative capacity throughout the tubular  
21 network. Going forward, we refer to this structure as the tubular autolysosomal (tAL)  
22 network.

23

### 24 **Formation of the tubular autolysosomal network requires lysosomal function,** 25 **independent of mTOR activity**

26 To test whether the autolysosomal degradative function is required for formation of the  
27 tubulated network, we examined effects from knockdown of lysosomal functions,  
28 *Spinster*, *TRPML* and *Vha68-3* (Dermaut et al., 2005; Wong et al., 2012; Mauvezin et  
29 al., 2015). Strikingly, knockdown of each disrupted the GFP:Stx17 tubular network  
30 (Figure 2H–I), suggesting that lysosomal homeostasis and/or cargo degradation is  
31 critical for network tubulation. Since uptake of extracellular DQ Red-BSA must occur  
32 for eventual colocalization at autolysosomes (Figure 2E), we postulated that formation  
33 of the tAL network may also depend on endocytic delivery to lysosomes (Guha et al.,

1 2003). To test this possibility, we conditionally disrupted *shibire*, the sole fly ortholog  
2 of dynamin involved in endocytic uptake for a significant portion of cell surface cargos  
3 delivered to lysosomes (Kosaka and Ikeda, 1983). Flies with the temperature-sensitive  
4 mutation, *shi<sup>ts1</sup>*, were reared at permissive temperature (19°C) until 12 h APF, shifted to  
5 restrictive temperature (29°C), and then examined at 20 h APF (Figure 2—figure  
6 supplement 2A). A block in *shibire* function scarcely affected Spin:RFP organization  
7 (Figure 2—figure supplement 2B–C), suggesting that dynamin-dependent endocytosis  
8 does not substantially contribute to formation of the tAL network.

9 In the process of ALR, autolysosomal tubulation depends on reactivation of  
10 mTORC1 activity in response to efflux of autophagic degradation products (Yu et al.,  
11 2010). To test if mTOR activity is involved in the formation of the tAL network, mTOR  
12 activity was forcibly inactivated or activated in DIOMs (Dibble and Cantley, 2015).  
13 Inactivation of mTOR by *Tor* or *Rheb* RNAi resulted in thinner DIOMs (Figure 2—  
14 figure supplement 3A–C), however, the formation of the tAL network was largely  
15 unaffected at both 20 h and 4 d APF (Figure 2—figure supplement 3C–D). In  
16 mammalian cells, forced activation of mTOR activity could suppress the loss of ALR  
17 tubulation due to *Spinster* RNAi (Rong et al., 2011). Activation of mTOR by *Tsc1*  
18 RNAi or *Rheb* overexpression led to thicker DIOMs (Figure 2—figure supplement 3E–  
19 F), however, was unable to suppress loss of the tAL network in *Spin* RNAi conditions  
20 (Figure 2—figure supplement 3G–H). Thus, our data suggest that mTOR activity is not  
21 essential for the formation of the tubulated autolysosome network in muscle.

### 22 23 **Formation of the tubular autolysosomal network depends on autophagy, but not** 24 **the Atg12 conjugation system**

25 Next, we asked if autophagy is required for formation of the tAL network. We tested the  
26 requirements for at least one *ATG* gene from each of the six functional protein units  
27 involved in autophagy (Mizushima et al., 2011), as well as genes required for the fusion  
28 between autophagosomes and lysosomes (Lőrincz and Juhász, 2019). RNAi of *Atg1*,  
29 *FIP200*, *Atg9*, *Atg18*, *Vps34*, *Stx17*, *SNAP29*, or *Vps39* each severely blocked formation  
30 of the tubular autolysosomal network (Figure 3A–B). In contrast, *Atg5*, *Atg7*, or *Atg12*  
31 RNAi showed only a minimal effect on the tubular network. We obtained similar results  
32 for the genes tested using tAL compartment markers, Spin:RFP (Figure 3A–B) or  
33 mCherry:Stx17 (Figure 3—figure supplement 1A–B). These results suggest the



1 importance of autophagy, surprisingly without the Atg12 conjugation system, for tAL  
2 network formation.

3 To verify that the categories of *ATG* gene results were not simply due to  
4 variability with hypomorphic RNAi conditions, we examined null mutants for *Atg5*,  
5 *Atg9*, and *Stx17* (Kim et al., 2016; Wen et al., 2017; Takáts et al., 2013). Consistent  
6 with the RNAi results, loss of *Atg9* or *Stx17* functions fully blocked tAL formation,  
7 while *Atg5* null mutants only partially reduced the extent of the tubulated network  
8 (Figure 3C–H and Figure 3—figure supplement 1C–E). The tubulated autolysosome  
9 still present in *Atg5* null mutant DIOMs was dependent on *Stx17* function (Figure 3I–J).  
10 The size of the *Stx17* vacuoles seen upon *Spinster* RNAi was significantly reduced by  
11 the combined knockdown of autophagy functions, *Atg18* or *Vps39* (Figure 3K–L),  
12 suggesting that the *Stx17* compartment size depends on membrane flux through  
13 autophagy. From these results, we conclude that autophagy – independent of the Atg12  
14 conjugation system – is necessary for formation of the tAL network.

15 A tubular lysosomal network has been reported in larval body wall muscles  
16 (Johnson et al., 2015). The authors reported that autophagy is not a prerequisite for the  
17 tubulation, since *Atg7* RNAi did not affect it. *Atg7* is an E1 enzyme for both the Atg12  
18 and Atg8 ubiquitin-like conjugation systems (Juhász et al., 2007). As in larval muscles,  
19 *Atg7* also was not required for formation of the tAL network in DIOMs (Figure 3A–B).  
20 Thus, we predicted that the tubular lysosome in larval body wall muscles may also  
21 depend on core *ATG* genes, but not *Atg5*, *Atg7* or *Atg12*. As reported, Spin:RFP-  
22 positive tubular lysosomes were observed close to the muscle cell surface in control and  
23 *Atg7* RNAi larval body wall muscles (Figure 3—figure supplement 2). In contrast, the  
24 tubular network was disrupted by *Atg1*, *Atg18* or *Stx17* RNAi (Figure 3—figure  
25 supplement 2), indicating that autophagy is also essential for the tubular lysosomal  
26 network in larval body wall muscles.

27

### 28 **Ultrastructure supports that autophagosome is membrane source for tAL network**

29 To analyze the ultrastructure of the tAL network, DIOMs were cut longitudinally and  
30 examined by transmission electron microscopy (TEM). Lysosomes and autolysosomes  
31 appear as electron-dense structures by TEM. Consistent with this, we observed electron-  
32 dense tubular structures in both control (Figure 4A, 4E–F) and *Atg5* null mutant DIOMs  
33 (Figure 4D). The diameter of the tubules seen by TEM were ranged between

1 approximately 50-100 nm. In contrast, mostly short or spherical electron-dense  
2 structures were observed in *Atg9* or *FIP200* null (Kim et al., 2013) (Figure 4B–C). On  
3 the other hand, large vacuolated structures accumulated upon *Spin* or *TRPML* RNAi  
4 (Figure 4G–H), consistent with the light microscopy results (Figure 2H).  
5 Autophagosome-like double-membrane vesicles were observed in *Atg5* null DIOMs  
6 (Figure 4—figure supplement 1), as similarly reported in *Atg3* KO mammalian cells  
7 (Tsuboyama et al., 2016), indicating that *Atg5* is not essential for elongation of the  
8 autophagic membrane in DIOMs at 1 d APF. Since autophagosome-like double-  
9 membrane vesicles and the tAL network are still formed in *Atg5* mutant muscles, yet the  
10 tAL network depends on *Stx17* (Figure 3I–J), we conclude that autophagic membrane is  
11 a primary membrane source for tAL network formation in both wildtype and *Atg5* null  
12 muscle cells.

13

#### 14 **Extent of tubular network correlates with muscle remodeling ability**

15 As shown above, there was a significant difference in the efficiency of tAL network  
16 formation between disruption of genes core to autophagy versus genes in the *Atg12*  
17 conjugation system (Figures 3–4). We next compared whether the same loss-of-function  
18 conditions also differentially impacted muscle remodeling. Knockdown of *FIP200*,  
19 *Atg9*, or *Atg18* had a noticeable effect on DIOM shape at 4 d APF, after remodeling is  
20 completed. However, knockdown of *Atg5* or *Atg12* did not affect muscle shape (Figure  
21 5A–B), demonstrating again two distinct categories of *ATG* phenotypes with DIOM  
22 remodeling.

23 We characterized each of the two phenotypic subgroups further at the  
24 organelle level using *Atg5* and *Atg9* mutant conditions. Following completion of  
25 remodeling, control DIOMs had well-organized myofibrils (F-actin) and T-tubules  
26 (*Dlg1*) at 4 d APF. While the shape was nearly normal for the *Atg5* null DIOMs, they  
27 contained both an organized peripheral layer of myofibrils and T-tubules and a  
28 disorganized central region at 4 d APF (Figure 5C). In contrast, *Atg9* null animals had  
29 irregularly shaped DIOMs with more extensively disorganized myofibrils and  
30 fragmented *Dlg1*-positive structures throughout the cells. Mitochondria accumulated  
31 with either *Atg5* or *Atg9* RNAi conditions (Figure 5E), suggesting a block in mitophagy  
32 for both conditions. GFP:*Stx17*-positive autophagic structures, however, only  
33 accumulated in *Atg5* RNAi but not in *Atg9* RNAi muscles (Figure 5F).

1           We performed TEM of transverse sections through remodeled DIOMs (Figure  
2 5—figure supplement 1A). Control DIOMs were filled with myofibrils and organized  
3 organelles recognizable by ultrastructure, such as mitochondria and T-tubules (Figure  
4 5G and Figure 5—figure supplement 1B). The *Atg5* null DIOMs instead were filled  
5 with thousands of autophagic membranes (Figure 5H and Figure 5—figure supplement  
6 1C and 1E), likely representative of the numerous GFP:Stx17-positive vesicles also  
7 shown to accumulate (Figure 5F). In contrast, *Atg9* null DIOMs were filled with  
8 mitochondria but lacked any recognizable autophagic compartments (Figure 5I and  
9 Figure 5—figure supplement 1D), similar to phenotypes previously described for *Atg1*  
10 or *Atg18* RNAi (Fujita et al., 2017). Collectively, these data demonstrate that there are  
11 two distinct loss of *ATG* phenotypes in DIOM remodeling, with the efficiency of tAL  
12 network formation correlating with the phenotypic severity of muscle remodeling: only  
13 a slightly reduced tAL network correlating with partially organized muscle (*Atg5*  
14 mutant), and a fully disrupted tAL network associated with more completely  
15 disorganized muscle (*Atg9* mutant).

16

### 17 **The tubulated lumen is continuous to synchronize autolysosomal capacity with** 18 **muscle remodeling**

19 What is an advantage of having autolysosome organization into a tubular network over  
20 numerous isolated spherical vesicles? The interconnected tAL network could enable  
21 synchronous degradative activity across broad regions of the relatively large muscle  
22 cells. To investigate the continuity of the tAL network, we performed fluorescence  
23 recovery after photobleaching (FRAP) analysis of fly cathepsin L, Cp1. At 24 h APF,  
24 GFP:Stx17 marked large, rounded intersections between several tubule branches that  
25 were filled with Cp1:mKO (Figure 6A–B). In control DIOMs, Cp1:mKO signal at the  
26 intersecting branchpoints recovered over several minutes after bleaching (Figure 6C and  
27 6E). In contrast, the signal of Cp1:mKO was not recovered in discontinuous vacuoles in  
28 *Spin* RNAi DIOMs (Figure 6D–E). These results show that the lumen of the tAL  
29 network is continuous and allows protein contents between tubules to intermix.

30           We next tested whether lysosomal activity is more homogeneous across a tAL  
31 network than that found amongst multiple individual lysosomes over a similar muscle  
32 area. LysoTracker Red or DQ Red-BSA was injected into pupae expressing GFP:Stx17  
33 to stain acidified compartments. Both indicators stained small discontinuous vesicles in

1 12 h APF DIOMs (Figure 7A and 7C) and the intersections of the tAL network in 24 h  
2 APF DIOMs (Figure 7A and 7C), respectively. The acquired confocal images were  
3 binarized, extracted objects, and the mean intensities of each LysoTracker Red or DQ  
4 Red-BSA-positive object were measured. As predicted, the intensities of LysoTracker  
5 Red or DQ-BSA were more heterogeneous in discontinuous lysosomes at 12 h APF and  
6 more homogeneous in the tAL network at 24 h APF (Figure 7B and 7D). These results  
7 indicate that the tAL network synchronizes the degradative compartments.  
8

## 1 Discussion

2

3 Tubular lysosomes have been known since over 40 years ago, but the mechanisms of  
4 how they are formed and their significance are mostly unknown. Here, we found  
5 expansion of a tubular autolysosomal network in the *Drosophila* abdominal muscles  
6 during metamorphosis. The tubular network appears transiently and is fully functional  
7 as a degradative organelle. The formation of the network depends on not only  
8 autophagy but also the degradation capacity of acidic organelles. FRAP analysis of  
9 cathepsin L revealed that the lumen of the tubular network is continuous and  
10 intermixed. As far as we know, the autophagy-dependent activity of a tubular lysosomal  
11 network has not been reported. Accordingly, we designate the structure as the tubular  
12 autolysosomal network, or tAL network.

13 In contrast to the already known tubular lysosomes, the tAL network is an  
14 autophagy-related organelle (Figure 7E). First, we found the tAL network is uniquely  
15 marked with *Stx17*, previously known as an autophagosomal SNARE (Figure 1).  
16 However, the tAL network has characteristics of autolysosomes and not  
17 autophagosomes (Figure 2). Further, the formation of the tAL network depends on  
18 autophagy, and the loss of a series of *ATG* genes led to the accumulation of only small  
19 spherical lysosomes (Figures 3–4, Figure 3—figure supplement 1, and, Figure 7—  
20 figure supplement 1A). To our surprise, components of *Atg12* and *Atg8* systems were  
21 not essential for formation of the tAL network (Figures 3–4 and Figure 7—figure  
22 supplement 1B).

23 How is the tAL network formed in absence of *Atg5*, a component of the  
24 *Atg12* system? The formation of the tAL network in wildtype and *Atg5* deficient  
25 muscles both depended on *Stx17* (Figure 3I–J). Further, elongated autophagic  
26 membranes accumulated in the *Atg5* null DIOMs (Figure 4—figure supplement 1). We  
27 propose that the fusion between autophagic membranes and lysosomes results in the  
28 formation of the tAL network (Figure 7—figure supplement 1B). We predict that the  
29 autophagic membrane but not the endocytic membrane is the dominant membrane  
30 source, since inhibition of the fusion of autophagosome and lysosome wholly prevented  
31 tAL network formation (Figure 3). Consistent with this notion, a block in dynamin-  
32 dependent endocytosis hardly affected the tAL network (Figure 2—figure supplement  
33 2A–C). The formation of a tAL network in *Atg5* null DIOMs could be explained by

1 diminished yet ongoing leaky autophagic flux. Because almost all autophagic flux  
2 assays in *Drosophila* utilize Atg8, lipidation of which depends on Atg5, we could not  
3 judge the autophagic flux in the *Atg5* null mutant; however, the *Atg5* null mutant might  
4 degrade autophagic cargoes to some extent. Our TEM analysis revealed the existence of  
5 elongated autophagic membrane in the *Atg5* null DIOMs (Figure 4—figure supplement  
6 1). Even if the autophagosomal membranes are incompletely closed in the *Atg5* null  
7 condition, which would block autophagy, membrane fusion with multiple lysosomes  
8 could result in autophagosomal membrane closure. It is critical to establish an Atg8-  
9 independent autophagic flux assay to test the hypothesis.

10           It has been reported that *Drosophila* larval muscles have a tubular lysosomal  
11 network (Johnson et al., 2015). Since *Atg7* RNAi did not block the tubulation, it was  
12 thought that autophagy is dispensable for the tubular network formation. Through the  
13 analysis of the tAL network in pupal DIOMs, we found that *Atg7* and other components  
14 of two ubiquitin-like conjugation systems were dispensable for formation of the tAL  
15 network, the same as the tubular lysosomal network in larval body wall muscle (Figures  
16 3–4). Further, we revealed that the tubular lysosomal network in larval muscles also  
17 depended on *Atg1*, *Atg18*, and *Stx17* (Figure 3—figure supplement 2), in agreement  
18 with our result in pupal muscle. Thus, it is reasonable to think that the tAL network and  
19 the tubular lysosome in larval muscles are closely related structures. Although we first  
20 discovered the tAL network in DIOMs during metamorphosis, we observed a similar  
21 structure to varying degrees in other muscles, such as the adult indirect flight muscles  
22 that form in the pupal thorax and dorsal longitudinal muscles in the abdomen.

23           The tAL network has different characteristics from ALR tubules, which are  
24 proto-lysosomes and do not have degradation capacities (Chen and Yu, 2013). The tAL  
25 exhibits acidification and degradative function throughout the tubular network, and both  
26 endocytosed DQ Red-BSA and autophagosomes were degraded in the structure (Figure  
27 2). Although the tAL network and the ALR tubules have these dissimilarities, both are  
28 autolysosome-related compartments. More work is needed to address whether the  
29 formation of the tAL network also depends on factors involved in ALR, such as  
30 clathrin, PI(4,5)P<sub>2</sub>, microtubules, and Kinesin 1 (Rong et al., 2012; Du et al., 2016).

31           To our surprise, *Stx17* localizes to the autolysosomal compartment in the  
32 remodeling muscle (Figure 2). So far, it is known that *Stx17* localizes to the  
33 autophagosome and detaches just after fusion with the lysosome in mammalian cells

1 (Tsuboyama et al., 2016). Stx17 is a unique SNARE protein, which has a hairpin-like  
2 two  $\alpha$ -helices in its carboxy-terminus. Through the acidic  $\alpha$ -helices, Stx17 is  
3 specifically recruited to the autophagic membranes (Itakura et al., 2012; Takáts et al.,  
4 2013). Similar to Stx17, the ER morphogens, such as Reticulons and REEPs, have  
5 hairpin-like membrane-anchoring domains, which are inserted into and drive  
6 deformation of the ER membrane like wedges (Park and Blackstone, 2010). Therefore,  
7 it is possible to speculate that Stx17 induces the tubulation of membranes, like the ER  
8 morphogens. Further studies are required to reveal the mechanisms shaping positive  
9 membrane curvature and a highly branched network of the tAL network.

10           What is the advantage to forming a tubular autolysosomal network? Our data  
11 suggests that there are two merits of the tAL network over spherical autolysosomes.  
12 First, is the expansion of the surface area. TEM data indicates that the diameter of the  
13 tubes is ranged between 50-100 nm (Figure 4). If we compare a ratio of surface area per  
14 volume of a 70-nm-diameter tube and 500-nm-diameter spherical vesicle, the tube has  
15 ~5 times higher score than that of the vesicle (Figure 7—figure supplement 1C). The  
16 formation of a tAL network would increase the chance of docking and fusion of  
17 autophagosomes with the degradative compartments. Autophagy is massively induced  
18 with the onset of DIOM remodeling (Fujita et al., 2017), and autophagosomes fuse with  
19 and are degraded in the tAL network (Figure 2F–G). Thus, the tAL network would  
20 allow handling the extremely high autophagic flux in the relatively large,  
21 multinucleated muscles cells. We propose that there is positive feedback on the  
22 autophagic degradation in the remodeling DIOMs. The induction of autophagy to higher  
23 levels leads to the tAL network formation, which is able to more efficiently fuse with  
24 and degrade more autophagosomes than are spherical lysosomes. Alternatively, the  
25 expanded surface by tubulation may be advantageous for the process of  
26 microautophagy, in which the lysosomes directly engulf cytosolic materials by  
27 membrane invagination (Oku and Sakai, 2018).

28           The second benefit to tubulated autolysosomes is the synchronization of the  
29 degradative compartments in the cell. FRAP analysis of Cp1:mKO revealed that the  
30 lumen of the tAL network is continuous and intermixed (Figure 6C–E). With DIOM  
31 remodeling, organelles are disassembled in the early pupal stage and then reassembled  
32 in the late pupal stage (Figure 7F). For the regulated muscle remodeling, all events, such  
33 as degradation and signaling from the degradative organelle, must be synchronized.

1 Because muscles are massive cells, it is difficult to synchronize a number of spherical  
2 lysosomes over a wide cellular region. The formation of the tubular network would  
3 synchronize the degradative compartments in the cell (Figure 7—figure supplement  
4 1C). Consistent with this notion, we showed that the tAL network activity is more  
5 homogeneous than the activity of discontinuous, spherical lysosomes (Figure 7A-D).

6 Both *Atg5* and *Atg9* seem to be pivotal for autophagy in DIOMs; however,  
7 the null mutants showed distinct phenotypes on both the tAL network and muscle  
8 remodeling (Figure 5). In contrast to *Atg9*, *Atg5* was required but not essential for the  
9 formation of the tAL network (Figures 3–4). Again, *Atg5* null induced a milder  
10 phenotype than *Atg9* null on the muscle remodeling (Figure 5). Further, we observed  
11 that the muscle remodeling was also severely affected in *Spin* or *Vha68-3* RNAi, which  
12 induced loss of the tAL network in 1 d APF DIOMs (Figure 2H). These correlations  
13 suggest that the extent of the tAL network plays an important role in DIOM remodeling  
14 (Figure 7F).

15 The existence of the tubular lysosome has been known in a variety of tissues;  
16 however, the mechanism and biological significance of the tubulation remain obscure  
17 and highly speculative. It is likely that mammalian muscles also have the tubulated  
18 lysosomes (Robinson et al., 1986; Okada et al., 1986). Because the tubular lysosomes,  
19 including the tAL network in DIOMs, are fragile and highly sensitive to dissection and  
20 fixation processes, live imaging is an essential technique for the analysis of the  
21 structure. Since fly abdominal muscles are located close to the transparent overlying  
22 cuticle, we succeeded in observing the tubular autolysosome in live animals through the  
23 cuticle. Hence, *Drosophila* is an ideal model system to analyze the tubular lysosomal  
24 network and the dynamics of muscle remodeling. Our findings in this study provide  
25 new insights into the mechanisms of the morphogenesis of lysosomes as well as  
26 regulation of fundamental membrane trafficking pathways, such as autophagy and  
27 endocytosis. We predict that the expansion of surface area and synchronization are the  
28 keys to understanding the tubular lysosomes. Identification of genes that are specifically  
29 required for the tubular network would be the next crucial step and answer the  
30 fundamental question, why the lysosomes dynamically change shape in certain  
31 conditions.

32



## 1 **Materials and methods**

2

## 3 **Reagents and antibodies**

4 The following reagents were used: Alexa Fluor 546 Phalloidin conjugate (1.0 U/mL;  
5 Invitrogen), LysoTracker Red DND-99 (Thermo Fisher Scientific, Waltham, MA), and  
6 DQ-Red BSA (Thermo Fisher Scientific, Waltham, MA). The following antibodies  
7 were used: mouse anti-fly Dlg1 (1:200; clone 4F3; Developmental Studies Hybridoma  
8 Bank, Iowa City, IA) and anti-mouse IgG Alexa Fluor 488 conjugate (1:1000; Thermo  
9 Fisher Scientific, Waltham, MA).

10

## 11 **Drosophila strains**

12 Flies were reared at 25°C, unless stated. For muscle-targeted gene expression, DMef2-  
13 GAL4 driver was used. *UAS-LacZ* was used as a control in RNAi experiments.  
14 Genotypes in figures were described in supplemental table 1. All genetic combinations  
15 were generated by standard crosses. Genotypes of flies used in this study include the  
16 following: (1) *Atg5<sup>5cc5</sup>/FM7 actin-GFP* (from JH. Lee; *Atg5* null), (2) *Atg9<sup>Gal4KO</sup>/CyO-*  
17 *GFP* (from G. C. Chen; *Atg9* null), (3) *Atg9<sup>d51</sup>/CyO-GFP* (from G. C. Chen; *Atg9* null),  
18 (4) *w; FIP200<sup>3F5</sup>/TM6B-GFP* (from J.H. Lee; *FIP200* null), (5) *w; FIP200<sup>4G7</sup>/TM6B-*  
19 *GFP* (from J.H. Lee; *FIP200* null), (6) *w; UASp-mCherry:GFP:Atg8a* (from H.  
20 Stenmark), (7) *y w; UAS-GFP:Atg8a* (from T. Neufeld), (8) *y w; UAS- mCherry:Atg8a*  
21 (from T. Neufeld), (9) *w; UAS-Spinster:myc:RFP/CyO* (From G. Davis), (10) *w; UAS-*  
22 *IR-Atg1* (from G. C. Chen), (11) *w, shi[1]* (Bloomington Drosophila Stock Center,  
23 BDSC 7968; *shibire* temperature-sensitive allele), (12) *w; Df(3L)Exel8098/TM6B,*  
24 *Tb[1]* (BDSC 7922; *Stx17* deficiency), (13) *y w; P{w[+mC]=GAL4-Mef2.R}3* (BDSC  
25 27390), (14) *w; P{w[+mC]=UAS-lacZ.B}melt[Bg4-I-2]* (BDSC 1776), (15) *y w;*  
26 *P{y[+t\*] w[+mC]=UAS-Lifeact-Ruby}VIE-19A* (BDSC 35545), (16) *w;*  
27 *P{w[+mC]=UAS-mCD8::GFP.L}LL5, P{UAS-mCD8::GFP.L}2* (BDSC 5137), (17) *w;*  
28 *P{w[+mC]=UAS-Rheb.Pa}3* (BDSC 9689), (18) *y v; P{y[+t7.7]*  
29 *v[+t1.8]=TRiP.HMS02818}attP40* (TRiP, BDSC 44098; TRPML RNAi), (19) *y v;*  
30 *P{y[+t7.7] v[+t1.8]=TRiP.HMS01611}attP2/TM3, Sb[1]* (TRiP, BDSC 36918; FIP200  
31 RNAi), (20) *y v; P{y[+t7.7] v[+t1.8]=TRiP.HMS01246}attP2* (TRiP, BDSC 34901;  
32 *Atg9* RNAi), (21) *y v; P{y[+t7.7] v[+t1.8]=TRiP.HMS01358}attP2/TM3, Sb[1]* (TRiP,  
33 BDSC 34369; *Atg7* RNAi), (22) *y v; P{y[+t7.7] v[+t1.8]=TRiP.HMS01153}attP2*

1 (TRiP, BDSC 34675; Atg12 RNAi), (23)  $y v$ ;  $P\{y[+t7.7]$   
2  $v[+t1.8]=TRiP.GL00012\}attP2$  (TRiP, BDSC 35144; Tsc1 RNAi), (24)  $y v$ ;  $P\{y[+t7.7]$   
3  $v[+t1.8]=TRiP.HMS00923\}attP2$  (TRiP, BDSC 33966; Rheb RNAi), (25)  $y v$ ;  
4  $P\{y[+t7.7] v[+t1.8]=TRiP.GL00156\}attP2$  (TRiP, BDSC 35578; Tor RNAi), (26)  $y v$ ;  
5  $P\{y[+t7.7] v[+t1.8]=TRiP.JF01937\}attP2$  (TRiP, BDSC 25896; Stx17 RNAi), (27)  $y$   
6  $v$ ;  $P\{y[+t7.7] v[+t1.8]=TRiP.JF01883\}attP2$  (TRiP, BDSC 25862; SNAP29 RNAi),  
7 (28)  $y v$ ;  $P\{y[+t7.7] v[+t1.8]=TRiP.HMS02438\}$  (TRiP, BDSC 42605; Vps39 RNAi),  
8 (29) *Sco/CyO*;  $P\{UAS-Cp1.mKO2\}3$  (VDRC 309010), (30)  $P\{Mef2-GAL4\}3$ ,  $P\{UAS-$   
9  $Cp1.mKO2\}3/TM6B$ , *Tb[1]* (VDRC 309005), (31)  $w$ ; *UAS-IR-Atg18<sup>KK100064</sup>* (VDRC  
10 105366; Atg18 RNAi), (32)  $w$ ; *UAS-IR-Spinster* (NIG-Fly 8428R-4; Spin RNAi), (33)  
11  $w$ ; *UAS-IR-Vha68-3* (NIG-Fly 5075R-1; Vha68-3 RNAi), (34)  $w$ ; *UAS-IR-Vps34* (NIG-  
12 Fly 5373R-2; Vps34 RNAi), (35)  $w$ ; *UAS-IR-Atg5* (NIG-Fly 1643R-2; Atg5 RNAi),  
13 (36)  $w$ ; *UAS-mCD8:GFP*; *DMef2-GAL4*, *UAS-Dcr2*, (37)  $w$ ; *DMef2-GAL4*, *UAS-Dcr2*,  
14 (38)  $w$ ; *UAS-Dcr2*; *DMef2-GAL4*, *UAS-GFP:Stx17<sup>4</sup>*, and (39)  $w$ ; *UAS-GFP:Stx17<sup>4</sup>*.  
15 New genotypes generated during this study include the following: (40)  $w$ ; *DMef2-*  
16 *GAL4*, *UAS-GFP:Stx17<sup>4</sup>*, (41)  $w$ ; *UAS-Spin:myc:RFP/CyO*; *DMef2-GAL4*, *UAS-*  
17 *Dcr2/TM6C Sb Tb*, (42)  $w$ ; *Atg9<sup>d51</sup>*, *UAS-Spin:myc:RFP/CyO*; *DMef2-GAL4*, *UAS-*  
18 *Dcr2/TM6C Sb Tb*, (43)  $w$ ; *UAS-Spin:myc:RFP/CyO*; *DMef2-GAL4*, *Stx17<sup>LL06330</sup>/TM6C*  
19 *Sb Tb*, (44)  $w$ ; *UAS-Spin:myc:RFP/CyO*; *DMef2-GAL4*, *UAS-IR-Stx17<sup>TRiP.JF01937</sup>/TM6B*  
20 *Hu Tb*, (45)  $w$ ; *UAS-IR-Spinster<sup>NIG.8428R-4</sup>*, *UAS-mCherry:GFP:Stx17/CyO*; *DMef2-*  
21 *GAL4*, *UAS-Dcr2*, *tub-GAL80<sup>ts</sup>*, (46)  $w$ ; *UAS-Dcr2*; *DMef2-GAL4*, *sqh-*  
22 *YFP:Mito<sup>BDSC7194</sup>/TM6C Sb Tb*, (47)  $w$ ; *UAS-Dcr2/CyO*; *DMef2-GAL4*, *UAS-*  
23 *Cp1:mKO*, *UAS-GFP:Stx17*, (48)  $w$ ; *UAS-Dcr2*; *DMef2-GAL4*, *UAS-*  
24 *mCherry:Stx17/TM6C Sb Tb*, (49)  $w$ ; *Sp/CyO*; *DMef2-GAL4*, *UAS-*  
25 *mCherry:Stx17/TM6C Sb Tb*, (50)  $w$ ; *Atg9<sup>d51</sup>/CyO-GFP*; *DMef2-GAL4*, *UAS-*  
26 *mCherry:Stx17/TM6C Sb Tb*, and (51)  $w$ ; *Atg9<sup>d51</sup>/CyO-GFP*; *DMef2-GAL4*, *UAS-*  
27 *mCherry:Stx17/TM6C Sb Tb*.

28

## 29 DNA engineering

30 Standard molecular biology techniques were used to construct plasmid vectors. For  
31 multiple-fragment in vitro assembly, pCM43b vector was digested by *EcoRI* and *NotI*.  
32 mCherry and GFP:Stx17 were amplified using following primer sets; 5'-  
33 AGGGAATTGGGAATTCACCATGGTTTCAAAGGTGAAG-3' and 5'-

1 GCTTCCTCCTCCTCCCTTGTACAGCTCGTCCATGCCGCC-3' for mCherry, 5'-  
2 GGAGGAGGAGGAAGCATGGTGAGCAAGGGCGAG-3' and 5'-  
3 TCCTCTAGTGC GGCCTCATTCTGGCTTCTCTTTTAGC-3' for GFP:Stx17. The  
4 three DNA fragments were assembled using In-fusion HD cloning kit (Takara, Kusatsu,  
5 Japan). The resultant DNA construct (pCM43b-mCherry:GFP:Stx17) was validated by  
6 sequencing and then injected into embryos for phiC31 insertion.

7

### 8 **Muscle preparations and immunofluorescence in *Drosophila***

9 Muscle preparations in pupal abdomens were performed as previously described  
10 (Ribeiro et al., 2011). Staged pupae were removed from the pupal case and pinned on a  
11 sylgard-covered petri dish in dissection buffer (5 mM HEPES, 128 mM NaCl, 2 mM  
12 KCl, 4 mM MgCl<sub>2</sub>, 36 mM sucrose, pH 7.2). Abdomens were opened with  
13 microscissors, pinned flat, and fixed at room temp for 20 min. (4% formaldehyde, 50  
14 mM EGTA, PBS). Then, the samples were unpinned and blocked at room temp for 30  
15 min (0.3% bovine serum albumin, 2% goat serum, 0.6% Triton X100, PBS), incubated  
16 with primary antibody overnight at 4°C, washed (0.1% Triton PBS), then incubated for  
17 2 h at room temp with Alexa Fluor488-conjugated secondary antibodies (Thermo Fisher  
18 Scientific, Waltham, MA) and counterstained with phalloidin for F-actin as needed. The  
19 stained samples were washed and mounted in FluorSave reagent (Merck Millipore,  
20 Burlington, MA).

21

### 22 **Confocal fluorescence microscopy**

23 For imaging of live pupal DIOMs, staged pupae were removed from the pupal case,  
24 mounted between slide-glass and cover-glass following a protocol (Zitserman and  
25 Roegiers, 2011), and imaged through the cuticle from the dorsal side. Live DIOMs were  
26 observed on a confocal microscope FV1000D with a 60x oil/1.35 NA UPlanSApo  
27 (Olympus, Tokyo, Japan) or FV3000 with a 60x silicone/1.30 NA UPlanSApo  
28 (Olympus, Tokyo, Japan). The image acquisition software used was Fluoview  
29 (Olympus, Tokyo, Japan). The exported images were adjusted and analyzed using the  
30 ImageJ.

31

### 32 **Electron microscopy**

1 Staged pupae (20 h or 4 d APF) were removed from pupal cases, pinned on a sylgard-  
2 covered petri dish, dissected directly in fixative (2% paraformaldehyde, 2.5%  
3 glutaraldehyde, 150 mM sodium cacodylate, pH 7.4) and fixed for 2 h at room temp and  
4 then overnight at 4°C. The dissected fillets were washed with 0.1 M phosphate buffer  
5 pH 7.4, post-fixed in 1% OsO<sub>4</sub> buffered with 0.1 M phosphate buffer for 2 h,  
6 dehydrated in a graded series of ethanol, and embedded flat in Epon 812. Ultrathin  
7 sections, the thickness of 70 nm, were collected on copper grids covered with Formvar,  
8 double-stained with uranyl acetate and lead citrate, and then observed by a transmission  
9 electron microscope, H-7100 (Hitachi, Tokyo, Japan).

### 11 **Spinning-disk time-lapse imaging**

12 Twenty h APF DIOMs expressing GFP:Atg8 and Spin:RFP were imaged every 60 s for  
13 30 min using a 60x silicone/1.30 NA UPlanSApo objective (Olympus, Tokyo, Japan)  
14 on an inverted microscope (IX83; Olympus, Tokyo, Japan) with a spinning-disc  
15 confocal scanner unit (Dragonfly; Andor Technology, Belfast, UK) and a CMOS  
16 camera (Zyla 4.2; Andor Technology, Belfast, UK). Z-series images of each time point  
17 were exported using Fusion (Andor Technology, Belfast, UK). Then, the exported files  
18 were cropped, thresholded, and analyzed by the ImageJ.

### 20 **FRAP analysis**

21 Twenty-four h APF DIOMs expressing both Cp1:mKO and GFP:Stx17 were imaged  
22 using a 60x silicone/1.30 NA UPlanSApo objective on a confocal microscope, FV3000  
23 (Olympus, Tokyo, Japan). Three frames were acquired before photobleaching.  
24 Bleaching was performed on equally sized rectangular regions of interest (ROI) with a  
25 568-nm laser at 30.7% power for 2 ms per pixel. Images of each channel were  
26 immediately acquired after the bleaching at a 20 s interval for 440 s. ROI mean  
27 intensities were measured using the ImageJ. FRAP analysis to determine normalized  
28 fluorescence intensity was performed as described (Goodwin and Kenworthy, 2005).

### 30 **Fly injection**

31 Micro-injection was carried out using a stereomicroscope (SZX16; Olympus, Tokyo,  
32 Japan) with a manipulator (M-152; Narishige, Tokyo, Japan), an injector (IM-400;  
33 Narishige, Tokyo, Japan), and a compressor (0.2LE-8SB; Hitachi, Tokyo, Japan).

1 LysoTracker Red was diluted in DMSO to 1 mM, and DQ-BSA was diluted in water to  
2 10 mg/mL. The micro-injection needle was loaded with the solutions and then  
3 introduced into the abdomen of staged pupae. Although we could not control the exact  
4 amount of the solution for each injection, because of limitations imposed by our  
5 injection system, we roughly estimate the amount is 5 to 10 nL. Injected pupae were  
6 cultured at 25°C for 15 min for LysoTracker or 3 h for DQ-BSA, and observed on  
7 FV3000.

8

### 9 **Image analyses**

10 Quantification of tubules was performed as follows: the percentage of DIOMs  
11 containing tubule >5 μm in length was manually counted. At least 8 DIOMs were  
12 checked in each animal. More than 10 animals were analyzed in each genotype (Fig. 2I,  
13 3A-J, S2D, and S3A-E). Alternatively, the total tubule area (i.e., the sum of the area of  
14 all tubules) per unit area was measured by using the ImageJ. Intensities were binarized  
15 and then skeletonized by LpxLineExtract, which is invoked by Lpx\_Filter2d plugin in  
16 the LPixel ImageJ plugins package (Kuki et al., 2017). The >5 μm skeletonized lines in  
17 the images were extracted by using the analyze particles function in Fiji. More than 10  
18 cropped images were used for the quantification. The total tubule area per unit area was  
19 shown as an arbitrary value (Fig. 1E and S1D).

20 The distance between points at which GFP:Atg8 puncta disappeared or  
21 randomly simulated puncta and the nearest Spin:RFP-positive tubule was measured by  
22 using the measure function in the ImageJ (Fig. 2G). The Spin:RFP-positive tubules in  
23 the images were extracted, as mentioned above. As a simulation, we randomly drew  
24 puncta in images, in which GFP:Atg8-positive puncta disappeared, using the ImageJ  
25 plugin. More than 30 cases were used for the quantification.

26 Quantification of the diameter of vacuoles in Fig. 3L was performed as  
27 follows: the mCherry:GFP:Stx17-positive vacuole size was determined by a  
28 morphometric analysis using the ImageJ. More than 100 vacuoles from at least 10  
29 DIOM images were analyzed for each genotype. Images of GFP-channel were used for  
30 the quantification.

31 To categorize DIOM remodeling phenotypes, 4 d APF animals were dissected  
32 and stained for Dlg1 and F-actin. More than 10 animals were analyzed for each  
33 genotype. At least 10 DIOMs per animal were observed and categorized into these four

1 groups. 1) Regular, straight DIOM with organized myofibrils and T-tubules; 2) Thin  
2 myofibril layer, straight DIOM with thin myofibrils; 3) Disorganized, irregular shaped  
3 DIOM with disorganized myofibrils and T-tubules; 4) Detached, detached and rounded  
4 DIOM (Fig. 5D).

5 Quantification of the aspect ratio of DIOMs was performed as follows; 4 d  
6 APF animals expressing mCD8:GFP in muscle were observed by a fluorescent stereo  
7 microscope, SZX16 (Olympus, Tokyo, Japan) with a CMOS camera, ORCA-ER  
8 (Hamamatsu Photonics, Hamamatsu City, Japan). More than 50 DIOMs from at least  
9 five animals were analyzed each genotype. The aspect ratio, length per width, was  
10 determined by a morphometric analysis using the ImageJ (Fig. 5B, S2B, and S2F).

11 For the comparative analysis LysoTracker Red and DQ-BSA intensities, the  
12 acquired raw images were binarized, extracted, and measured the average fluorescent  
13 intensity of objects using the Fiji. The median intensity was set as one in each image.  
14 More than 250 objects from at least five images were analyzed for each time point.

15

## 16 **Statistics**

17 Each experiment was performed at least three times as biological and technical  
18 replicates (at least three different cohorts of unique flies were analyzed in repeat  
19 procedures performed on at least three different days). One exception was for TEM  
20 analyses, which were performed on two parallel replicates with multiple animals each.  
21 All replicate experiments were performed in parallel with wild-type controls. The SD  
22 was used as error bars for bar charts from the mean value of the data. When more than  
23 two genotypes or treatments were used in an experiment, the statistical analysis was  
24 performed using Tukey's test or Dunnett's test on Prism8 software. An unpaired 2-  
25 tailed student's t-test was used to compare two means. *F*-test was used to compare the  
26 dispersion between the two groups.  $p < 0.05$  was regarded as statistically significant.  
27  $p < 0.05$  is indicated with single asterisks, and  $p < 0.001$  is indicated with double asterisks.

28

1    **Acknowledgments**

2    We are grateful to GC. Chen (Academia Sinica), E. Kuranaga (Tohoku Univ.), JH. Lee  
3    (Univ. of Michigan), G. Davis (UCSF), T. Neufeld (Univ. of Minnesota), H. Stenmark  
4    (Oslo Univ. Hospital), Bloomington Drosophila Stock Center, DGRC, VDRC, FlyTrap,  
5    Kyoto DGGR, and NIG fly for reagents. We are grateful to members of the Fujita lab  
6    and Fukuda lab for helpful comments. This work was supported in part by Grant-in-Aid  
7    for Scientific Research (C) from the MEXT (grant number 18K06202 to NF), Grant-in-  
8    Aid for Scientific Research (B) from the MEXT (grant number 19H03220 to MF),  
9    Japan Science and Technology Agency (JST) PRESTO (grant number JPMJPR18H8 to  
10   NF), JST CREST (grant Number JPMJCR17H4 to MF), and the research grant of  
11   Astellas Foundation for Research on Metabolic Disorders (to NF).

12

13   **Author contributions**

14   NF designed the research; TM, YK, and NF performed the experiments; TM, YS, AAK,  
15   MF, and NF analyzed and interpreted data; NF took the lead in writing the manuscript.  
16   All authors provided critical feedback and helped shape the research and manuscript.

17

18   **Competing financial interests**

19   The authors declare no competing financial interests.

20

1   **References**

- 2
- 3   Araki, N., T.I. Tenkova, T. Fujiwara, and Y. Takashima. 1993. The shape and  
4       distribution of lysosomes and endocytosis in the ciliary epithelial cells of rats. *Cell*  
5       *Tissue Res.* 274:65–70. doi:10.1007/BF00327986.
- 6   Chen, Y., and L. Yu. 2013. Autophagic lysosome reformation. *Exp. Cell Res.* 319:142–  
7       146. doi:10.1016/j.yexcr.2012.09.004.
- 8   Dermaut, B., K.K. Norga, A. Kania, P. Verstreken, H. Pan, Y. Zhou, P. Callaerts, and  
9       H.J. Bellen. 2005. Aberrant lysosomal carbohydrate storage accompanies  
10       endocytic defects and neurodegeneration in *Drosophila* benchwarmer. *J. Cell Biol.*  
11       170:127–139. doi:10.1083/jcb.200412001.
- 12   Dibble, C.C., and L.C. Cantley. 2015. Regulation of mTORC1 by PI3K signaling.  
13       *Trends Cell Biol.* 25:545–555. doi:10.1016/j.tcb.2015.06.002.
- 14   Du, W., Q.P. Su, Y. Chen, Y. Zhu, D. Jiang, Y. Rong, S. Zhang, Y. Zhang, H. Ren, C.  
15       Zhang, X. Wang, N. Gao, Y. Wang, L. Sun, Y. Sun, and L. Yu. 2016. Kinesin 1  
16       drives autolysosome tubulation. *Dev. Cell.* 37:326–336.  
17       doi:10.1016/j.devcel.2016.04.014.
- 18   Fujita, N., W. Huang, T.H. Lin, J.F. Groulx, S. Jean, J. Nguyen, Y. Kuchitsu, I.  
19       Koyama-Honda, N. Mizushima, M. Fukuda, and A.A. Kiger. 2017. Genetic screen  
20       in *drosophila* muscle identifies autophagy-mediated T-tubule remodeling and a  
21       Rab2 role in autophagy. *Elife.* 6:1–30. doi:10.7554/eLife.23367.
- 22   Goodwin, J.S., and A.K. Kenworthy. 2005. Photobleaching approaches to investigate  
23       diffusional mobility and trafficking of Ras in living cells. *Methods.* 37:154–164.  
24       doi:10.1016/j.ymeth.2005.05.013.
- 25   Guha, A., V. Sriram, K.S. Krishnan, and S. Mayor. 2003. shibire mutations reveal  
26       distinct dynamin-independent and -dependent endocytic pathways in primary  
27       cultures of *Drosophila* hemocytes. *J. Cell Sci.* 116:3373–3386.  
28       doi:10.1242/jcs.00637.
- 29   Hipolito, V.E.B., E. Ospina-Escobar, and R.J. Botelho. 2018. Lysosome remodelling  
30       and adaptation during phagocyte activation. *Cell. Microbiol.* 20:1–8.  
31       doi:10.1111/cmi.12824.



- 1 Itakura, E., C. Kishi-Itakura, and N. Mizushima. 2012. The hairpin-type tail-anchored  
2 SNARE syntaxin 17 targets to autophagosomes for fusion with  
3 endosomes/lysosomes. *Cell*. 151:1256–1269. doi:10.1016/j.cell.2012.11.001.
- 4 Johnson, A.E., H. Shu, A.G. Hauswirth, A. Tong, and G.W. Davis. 2015. VCP-  
5 dependent muscle degeneration is linked to defects in a dynamic tubular lysosomal  
6 network in vivo. *Elife*. 4:1–20. doi:10.7554/elife.07366.
- 7 Juhász, G., B. Érdi, M. Sass, and T.P. Neufeld. 2007. Atg7-dependent autophagy  
8 promotes neuronal health, stress tolerance, and longevity but is dispensable for  
9 metamorphosis in *Drosophila*. *Genes Dev*. 21:3061–3066.  
10 doi:10.1101/gad.1600707.
- 11 Kim, M., H.L. Park, H.W. Park, S.H. Ro, S.G. Nam, J.M. Reed, J.L. Guan, and J.H.  
12 Lee. 2013. *Drosophila* Fip200 is an essential regulator of autophagy that attenuates  
13 both growth and aging. *Autophagy*. 9:1201–1213. doi:10.4161/auto.24811.
- 14 Kim, M., E. Sandford, D. Gatica, Y. Qiu, X. Liu, Y. Zheng, B.A. Schulman, J. Xu, I.  
15 Semple, S.-H. Ro, B. Kim, R.N. Mavioglu, A. Tolun, A. Jipa, S. Takats, M.  
16 Karpati, J.Z. Li, Z. Yapici, G. Juhasz, J.H. Lee, D.J. Klionsky, and M. Burmeister.  
17 2016. Mutation in ATG5 reduces autophagy and leads to ataxia with  
18 developmental delay. *Elife*. 5:1–18. doi:10.7554/elife.12245.
- 19 Kimura, S., T. Noda, and T. Yoshimori. 2007. Dissection of the autophagosome  
20 maturation process by a novel reporter protein, tandem fluorescent-tagged LC3.  
21 *Autophagy*. 3:452–460. doi:10.4161/auto.4451.
- 22 Knapp, P.E., and J.A. Swanson. 1990. Plasticity of the tubular lysosomal compartment  
23 in macrophages. *J. Cell Sci*. 95:433–439.
- 24 Kosaka, T., and K. Ikeda. 1983. Reversible blockage of membrane retrieval and  
25 endocytosis in the garland cell of the temperature-sensitive mutant of *Drosophila*  
26 melanogaster, shibirets1. *J. Cell Biol*. 97:499–507. doi:10.1083/jcb.97.2.499.
- 27 Kuki, H., T. Higaki, R. Yokoyama, T. Kuroha, N. Shinohara, S. Hasezawa, and K.  
28 Nishitani. 2017. Quantitative confocal imaging method for analyzing cellulose  
29 dynamics during cell wall regeneration in *Arabidopsis* mesophyll protoplasts.  
30 *Plant Direct*. 1. doi:10.1002/pld3.21.
- 31 Kuleesha, Y., W.C. Pua, and M. Wasser. 2016. A model of muscle atrophy based on  
32 live microscopy of muscle remodelling in *Drosophila* metamorphosis. *R. Soc.*  
33 *Open Sci*. 3. doi:10.1098/rsos.150517.

- 1 Lawrence, R.E., and R. Zoncu. 2019. The lysosome as a cellular centre for signalling,  
2 metabolism and quality control. *Nat. Cell Biol.* 21:133–142. doi:10.1038/s41556-  
3 018-0244-7.
- 4 Lőrincz, P., and G. Juhász. 2019. Autophagosome-lysosome fusion. *J. Mol. Biol.* 1–21.  
5 doi:10.1016/j.jmb.2019.10.028.
- 6 Martina, J.A., H.I. Diab, L. Lishu, L. Jeong-A, S. Patange, N. Raben, and R.  
7 Puertollano. 2014. The nutrient-responsive transcription factor TFE3 promotes  
8 autophagy, lysosomal biogenesis, and clearance of cellular debris. *Sci. Signal.* 7:1–  
9 31. doi:10.1126/scisignal.2004754.
- 10 Matsui, T., P. Jiang, S. Nakano, Y. Sakamaki, H. Yamamoto, and N. Mizushima. 2018.  
11 Autophagosomal YKT6 is required for fusion with lysosomes independently of  
12 syntaxin 17. *J. Cell Biol.* 217:2633–2645. doi:10.1083/jcb.201712058.
- 13 Mauvezin, C., P. Nagy, G. Juhász, and T.P. Neufeld. 2015. Autophagosome-lysosome  
14 fusion is independent of V-ATPase-mediated acidification. *Nat. Commun.* 6.  
15 doi:10.1038/ncomms8007.
- 16 Miao, R., M. Li, Q. Zhang, C. Yang, and X. Wang. 2020. An ECM-to-Nucleus  
17 Signaling pathway activates lysosomes for *C. elegans* larval development. *Dev.*  
18 *Cell.* 52:21-37.e5. doi:10.1016/j.devcel.2019.10.020.
- 19 Mizushima, N., T. Yoshimori, and Y. Ohsumi. 2011. The Role of Atg Proteins in  
20 Autophagosome Formation. *Annu. Rev. Cell Dev. Biol.* 27:107–132.  
21 doi:10.1146/annurev-cellbio-092910-154005.
- 22 Mrakovic, A., J.G. Kay, W. Furuya, J.H. Brumell, and R.J. Botelho. 2012. Rab7 and  
23 Arl8 GTPases are Necessary for Lysosome Tubulation in Macrophages. *Traffic.*  
24 13:1667–1679. doi:10.1111/tra.12003.
- 25 Okada, T., J.M. Robinson, and M.J. Karnovsky. 1986. Cytochemical localization of  
26 acid phosphatase in striated muscle. *Histochemistry.* 85:177–183.  
27 doi:10.1007/BF00494801.
- 28 Oku, M., and Y. Sakai. 2018. Three distinct types of microautophagy based on  
29 membrane dynamics and molecular machineries. *BioEssays.* 40:1–6.  
30 doi:10.1002/bies.201800008.
- 31 Oliver, C. 1980. Cytochemical localization fo acid phosphatase and trimetaphosphatase  
32 activities in exocrine acinar cells. *J. Histochem. Cytochem.* 28:78–81.

- 1 Park, S.H., and C. Blackstone. 2010. Further assembly required: Construction and  
2 dynamics of the endoplasmic reticulum network. *EMBO Rep.* 11:515–521.  
3 doi:10.1038/embor.2010.92.
- 4 Ribeiro, I., L. Yuan, G. Tanentzapf, J.J. Dowling, and A. Kiger. 2011. Phosphoinositide  
5 regulation of integrin trafficking required for muscle attachment and maintenance.  
6 *PLoS Genet.* 7. doi:10.1371/journal.pgen.1001295.
- 7 Robinson, J.M., R. Okada, J.J. Castellot, and M.J. Karnovsky. 1986. Unusual lysosomes  
8 in aortic smooth muscle cells: Presence in living and rapidly frozen cells. *J. Cell*  
9 *Biol.* 102:1615–1622. doi:10.1083/jcb.102.5.1615.
- 10 Rong, Y., M. Liu, L. Ma, W. Du, H. Zhang, Y. Tian, Z. Cao, Y. Li, H. Ren, C. Zhang,  
11 L. Li, S. Chen, J. Xi, and L. Yu. 2012. Clathrin and phosphatidylinositol-4,5-  
12 biphosphate regulate autophagic lysosome reformation. *Nat. Cell Biol.* 14:924–  
13 934. doi:10.1038/ncb2557.
- 14 Rong, Y., C. McPhee, S. Denga, L. Huanga, L. Chen, M. Liu, K. Tracy, E.H. Baehreck,  
15 L. Yu, and M.J. Lenardo. 2011. Spinster is required for autophagic lysosome  
16 reformation and mTOR reactivation following starvation. *Proc. Natl. Acad. Sci. U.*  
17 *S. A.* 108:7826–7831. doi:10.1073/pnas.1013800108.
- 18 Sardiello, M., M. Palmieri, A. di Ronza, D.L. Medina, M. Valenza, V.A. Gennarino, C.  
19 Di Malta, F. Donaudy, V. Embrione, R.S. Polishchuk, S. Banfi, G. Parenti, E.  
20 Cattaneo, and A. Ballabio. 2009. A gene network regulating lysosomal biogenesis  
21 and function. *Science.* 325:473–7. doi:10.1126/science.1174447.
- 22 Shi, Y., M. Sakai, and K. Ogawa. 1992. Ultracytochemical study on nematolysosomes  
23 in neurons of the central nervous system. *Act. Histochem. Cytochem.* 25:437–445.
- 24 Swanson, J., E. Burke, and S.C. Silverstein. 1987. Tubular lysosomes accompany  
25 stimulated pinocytosis in macrophages. *J. Cell Biol.* 104:1217–1222.  
26 doi:10.1083/jcb.104.5.1217.
- 27 Takáts, S., G. Glatz, G. Szenci, A. Boda, G. V. Horváth, K. Hegedűs, A.L. Kovács, and  
28 G. Juhász. 2018. Non-canonical role of the SNARE protein Ykt6 in  
29 autophagosome-lysosome fusion. *PLoS Genet.* 14:1–23.  
30 doi:10.1371/journal.pgen.1007359.
- 31 Takáts, S., P. Nagy, Á. Varga, K. Piracs, M. Kárpáti, K. Varga, A.L. Kovács, K.  
32 Hegedus, and G. Juhász. 2013. Autophagosomal Syntaxin17-dependent lysosomal

- 1 degradation maintains neuronal function in *Drosophila*. *J. Cell Biol.* 201:531–539.  
2 doi:10.1083/jcb.201211160.
- 3 Tsuboyama, K., I. Koyama-Honda, Y. Sakamaki, M. Koike, H. Morishita, and N.  
4 Mizushima. 2016. The ATG conjugation systems are important for degradation of  
5 the inner autophagosomal membrane. *Science* 354:1036–1041.  
6 doi:10.1126/science.aaf6136.
- 7 Wen, J.K., Y.T. Wang, C.C. Chan, C.W. Hsieh, H.M. Liao, C.C. Hung, and G.C. Chen.  
8 2017. Atg9 antagonizes TOR signaling to regulate intestinal cell growth and  
9 epithelial homeostasis in *Drosophila*. *Elife*. 6:1–22. doi:10.7554/eLife.29338.
- 10 Wong, C.O., R. Li, C. Montell, and K. Venkatachalam. 2012. *Drosophila* TRPML is  
11 required for TORC1 activation. *Curr. Biol.* 22:1616–1621.  
12 doi:10.1016/j.cub.2012.06.055.
- 13 Yu, L., C.K. McPhee, L. Zheng, G.A. Mardones, Y. Rong, J. Peng, N. Mi, Y. Zhao, Z.  
14 Liu, F. Wan, D.W. Hailey, V. Oorschot, J. Klumperman, E.H. Baehrecke, and M.J.  
15 Lenardo. 2010. Termination of autophagy and reformation of lysosomes regulated  
16 by mTOR. *Nature* 465:942–946. doi:10.1038/nature09076.
- 17 Zitserman, D., and F. Roegiers. 2011. Live-cell imaging of sensory organ precursor  
18 cells in intact *Drosophila* pupae. *J. Vis. Exp.* 1–4. doi:10.3791/2706.  
19

1 **Figure legends**

2

3 **Figure 1 Syntaxin 17 marks a tubular network in remodeling muscle cells**

4 (A) Timeline of fly development from third instar larva to adult at 25°C, days after  
5 puparium formation (d APF). (B) Time course microscopy of mCD8:GFP in dorsal  
6 abdominal muscles during metamorphosis. (C and D) Time course microscopy of  
7 GFP:Stx17 in dorsal internal oblique muscle (DIOM) imaged through the cuticle of live  
8 wildtype animals from third instar larvae (3IL) to 4 d APF (C), from 12 h to 20 h APF  
9 (D). (E) Quantification of GFP:Stx17-positive tubules in DIOMs from 12 to 24 h APF.  
10 The values are the mean  $\pm$  standard deviation (SD), n=7.

11

12 **Figure 2 The Syntaxin 17 tubular network has characteristics of autolysosomes**

13 (A) Time course microscopy of mCherry:GFP:Atg8 in DIOM imaged through the  
14 cuticle of live animals from 3IL to 4 d APF. (B) Colocalization between GFP:Stx17 and  
15 mCherry:Atg8 in 20 h APF DIOM. (C) Colocalization between GFP:Stx17 and  
16 Spin:RFP, Cp1:mKO, or Lifeact:Ruby in 20 h APF DIOMs. Line plot profiles of the  
17 yellow line in each panel. (D and E) Live pupae were injected with LysoTracker Red  
18 (D) or DQ Red-BSA (E), and DIOMs were imaged through the cuticle at 20 h APF.  
19 Line plot profiles of the yellow line in each panel. (F and G) Time-lapse imaging of  
20 Spin:RFP and GFP:Atg8a in 20 h APF DIOMs (F). Disappearing GFP punctum, white  
21 arrowhead; shape-change of tubular lysosome, colorless arrowhead. Quantification of  
22 the distance of Spin:RFP-positive tubule, and the point at which GFP:Atg8 puncta  
23 disappeared (GFP:Atg8) or randomly drawn puncta (random), n>30. \*, p<0.05  
24 (Student's *t*-test) (G). (H and I) GFP:Stx17 localization in DIOMs at 20 h APF in  
25 control, *Spin* RNAi, *TRPML* RNAi, or *Vha68-3* RNAi (H). Mean percent + SD of  
26 DIOMs with more than 5  $\mu$ m GFP:Stx17-positive tubules, n=10. \*\*, p<0.001  
27 (Dunnett's test) (I).

28

29 **Figure 3 Formation of the tubular autolysosomal network depends on autophagy,**  
30 **but not the Atg12 conjugation system**

31 (A and B) Effect of RNAi of autophagy-related (*ATG*) genes on Spin:RFP-positive  
32 tubular network in 20 h APF DIOMs (A). Mean percent + SD of DIOMs with more  
33 than 5  $\mu$ m Spin:RFP-positive tubules, n=10. \*, p<0.05; \*\*, p<0.001 (Dunnett's test) (B).

1 (C-E) Spin:RFP-positive tubules in control (C), *Atg5* null (D), or *Atg9* null (E) DIOMs  
2 at 20 h APF. (F) Mean percent + SD of DIOMs with Spin:RFP-positive tubules in  
3 control or *Atg9* null mutant, n=10. \*\*, p < 0.001 (Student's *t*-test). (G and H) Spin:RFP-  
4 positive tubules in *Stx17* null DIOMs at 20 h APF (G). Mean percent + SD of DIOMs  
5 with Spin:RFP-positive tubules in control or *Stx17* null, n=10. \*\*, p < 0.001 (Student's *t*-  
6 test) (H). (I and J) Spin:RFP in *Stx17*-knockdown *Atg5* null DIOMs at 20 h APF (I).  
7 Mean percent + SD of DIOMs with Spin:RFP-positive tubules in control, *Atg5* null, or  
8 combination of *Atg5* null and *Stx17* RNAi, n=10. \*\*, p < 0.001 (Tukey's test) (J). (K and  
9 L) Co-RNAi of *Spin* and *Atg18* or *Vps39* on mCherry:GFP:Stx17 in 20 h APF DIOMs  
10 (K). Violin plot of the diameter of mCherry:GFP:Stx17-positive vesicles in each  
11 genotype, n=100. \*\*, p < 0.001 (Dunnett's test) (L).

12

13 **Figure 4 Ultrastructure supports that autophagosome is membrane source for tAL**  
14 **network**

15 TEM images of 20 h APF DIOMs of control (A, E, F), *Atg9* null (B), *FIP200* null (C),  
16 *Atg5* null mutant (D), *Spin* RNAi (G), or *TRPML* RNAi (H). Typical examples of  
17 electron-dense membranous tubular structures in control DIOMs (E and F).

18

19 **Figure 5 Extent of tubular network correlates with muscle remodeling ability**

20 (A and B) Effect of RNAi of *ATG* genes on the shape of DIOMs at 4 d APF (A). Violin  
21 plot of the aspect ratio of DIOMs, n > 50. N.S, not significant; \*\*, p < 0.001 (Dunnett's  
22 test) (B). (C and D) T-tubule (Dlg1, green) and myofibril (F-actin, magenta)  
23 organization in DIOMs of control, *Atg5* null, or *Atg9* null (C). Quantification of DIOM  
24 phenotypes in control, *Atg5* null, or *Atg9* null DIOMs, n > 10. (D). Regular, straight  
25 DIOM with organized myofibrils and T-tubules; Thin myofibril layer, straight DIOM  
26 with thin myofibrils; Disorganized, irregular shaped DIOM with disorganized  
27 myofibrils and T-tubules; Detached, detached and rounded DIOM. (E) Mitochondria  
28 (YFP:Mito, green) and myofibrils (F-actin, magenta) in 4 d APF DIOMs of control,  
29 *Atg5*, or *Atg9* RNAi. (F) Autophagic membranes (GFP:Stx17, green) and myofibrils (F-  
30 actin, magenta) in 4 d APF DIOMs of control, *Atg5*, or *Atg9* RNAi. (G-I) TEM images  
31 of 4 d APF DIOM transverse-sections of control (G), *Atg5* null (H), or *Atg9* null (I).

32

33 **Figure 6 The tubulated autolysosome lumen is continuous and intermixed**

1 (A and B) Colocalization of GFP:Stx17 and Cpl:mKO in 24 h APF DIOM (A). Line  
2 plot profiles of the yellow line in panel A (B). (C and D) FRAP analysis of Cpl:mKO in  
3 24 h APF DIOMs of control (C) or *Spin* RNAi (D). (E) Quantification of panels C and  
4 D. The average  $\pm$  SD is shown, n=5.

5

## 6 **Figure 7 The tubular autolysosomal network synchronizes the degradative** 7 **compartments**

8 (A and B) Micro-injected LysoTracker Red and GFP:Stx17 in 12 or 24 h APF DIOMs.  
9 The intensity map shows a representative image of the intensities of LysoTracker Red-  
10 positive objects. The median intensity in each image was set as 60 (A). The intensities  
11 of LysoTracker-positive objects were shown in a scatter plot, n>250. The median  
12 intensity was set as one for each image. \*\*, p<0.001 (*F*-test) (B). (C and D) Micro-  
13 injected DQ Red-BSA and GFP:Stx17 in 12 or 24 h APF DIOMs. The intensity map  
14 shows the intensities of DQ Red-BSA-positive objects. The median intensity in each  
15 image was set as 60 (C). The intensities of DQ Red-BSA-positive objects were shown  
16 in a scatter plot, n>250. The median intensity was set as one for each image. \*\*,  
17 p<0.001 (*F*-test) (D). (E) Both autophagy and lysosomal degradative activity are  
18 required for the tAL network formation. (F) The tAL network functions in the  
19 degradation of organelles in the remodeling of *Drosophila* abdominal muscles.

20

21

## 22 **Supplementary figure legends**

23

### 24 **Figure 2–figure Supplement 1**

25 Time-lapse imaging of Spin:RFP and GFP:Atg8a in 20 h APF DIOMs.

26 Top row, XY slices. Bottom row, XZ slices.

27

### 28 **Figure 2–figure Supplement 2**

29 Blockade of *shibire* on tAL network formation

30 (A) Scheme of an experiment using *shibire* temperature-sensitive mutant (*shi<sup>ts1</sup>*). *shi<sup>ts1</sup>*

31 mutant was incubated at 19°C all the time (Permissive) or 29°C from P4 to P5 stage

32 (Restrictive). (B and C) Spin:RFP-positive tubular network in DIOM at P5 stage (B).

1 Quantification of the Spin:RFP-positive tubules in panel B (C). The average  $\pm$  SD is  
2 shown, n=5. NS, not significant; (Student's *t*-test).

### 3 4 **Figure 2–figure Supplement 3**

5 Forced activation or inactivation of mTOR in DIOMs

6 (A and B) Effect of forced mTOR inactivation on the shape of DIOMs at 4 d APF (A).

7 Violin plot of the aspect ratio of DIOMs, n>40. \*\*, p<0.001 (Dunnett's test) (B). (C and

8 D) Effect of forced mTOR inactivation on the formation of the Spin:RFP-positive

9 tubular structures in 20 h APF DIOMs (C). Mean percent + SD of DIOMs with

10 Spin:RFP-positive tubules, n=10. \*, p<0.05 (Dunnett's test) (D). (E and F) Effect of

11 forced mTOR activation on the shape of DIOMs at 4 d APF (E). Violin plot of the

12 aspect ratio of DIOMs, n>50. \*\*, p<0.001 (Dunnett's test) (F). (G and H) Genetic

13 interaction between *Spin* and mTOR regulators. Combination of *Spin* RNAi and *Tsc1*

14 RNAi or *Rheb* overexpression on mCherry:GFP:Stx17-positive structures in 20 h APF

15 DIOMs (G). Mean percent + SD of DIOMs with Stx17-positive tubules, n=10. N.S, not

16 significant (Dunnett's test) (H).

### 17 18 **Figure 3–figure Supplement 1**

19 Loss of *ATG* genes on mCh:Stx17-positive tubules

20 (A and B) Effect of RNAi of autophagy-related genes on mCherry:Stx17-positive

21 tubules in 20 h APF DIOMs (A). Mean percent + SD of DIOMs with more than 5  $\mu$ m

22 mCherry:Stx17-positive tubules, n=10. \*, p<0.05; \*\*, p<0.001 (Dunnett's test) (B). (C-

23 E) mCherry:Stx17 in control, *Atg9* null, or *Atg5* null DIOMs at 20 h APF (C). Mean

24 percent + SD of DIOMs with more than 5  $\mu$ m mCherry:Stx17-positive tubules in

25 control or *Atg9* null, n=10 (D), control or *Atg5* null, n=10 (E). \*\*p<0.001 (Student's *t*-

26 test).

### 27 28 **Figure 3–figure Supplement 2**

29 Effect of RNAi of autophagy-related genes on Spin:RFP-positive tubules in 3IL body

30 wall muscle. The images are sections close to the sarcolemma. N, nucleus.

### 31 32 **Figure 4–figure Supplement 1**



1 Typical double-membraned structures in the electron micrograms of *Atg5* null DIOMs  
2 at 20 h APF.

3

#### 4 **Figure 5–figure Supplement 1**

5 TEM analysis of *Atg5* null and *Atg9* null DIOMs at 4 d APF

6 (A) Schematic of an DIOM TEM transverse section. (B-D) TEM images of 4 d APF  
7 DIOM transverse-sections of control (B), *Atg5* null (C), or *Atg9* null (D). (E) Typical  
8 examples of autophagic structures in *Atg5* null DIOMs at 4 d APF.

9

#### 10 **Figure 7–figure Supplement 1**

##### 11 **Possible model of the tAL network formation and its significance**

12 (A) No autophagic membrane in loss of *Atg1*, *9*, or *18*, which results in no tAL network.  
13 (B) Fusion of late isolation membranes with lysosomes leads to partially defective tAL  
14 network in loss of *Atg5*, *7*, or *12*. (C) A ratio of surface area per volume of a ranging  
15 between 50 to 70-nm-diameter tube and 500-nm-diameter spherical vesicle. The tube  
16 has ~5 times higher score than that of the vesicle. (D) The tAL network is homogeneous  
17 over a wide range compared to a number of spherical, discontinuous lysosomes.

18

##### 19 **Supplementary file 1**

20 Detailed *Drosophila* genotypes shown in figures.

21

##### 22 **Figure 2–Supplementary video 1**

23 Time-lapse imaging of Spin:RFP and GFP:Atg8a in 20 h APF DIOMs. The DIOMs was  
24 imaged every 60 s for 30 min on an inverted microscope with a spinning-disc confocal  
25 scanner unit and a CMOS camera. Z-stacked images were shown.

26

##### 27 **Source data file legends**

28

29 **Figure 1-source data 1.** Relates to Figure 1E. Quantification of GFP:Stx17-positive  
30 tubules in DIOMs from 12 to 24 h APF (.xlsx file).

31

32 **Figure 2-source data 1.** Relates to Figure 2G. Quantification of the distance of  
33 Spin:RFP-positive tubule, and the point at which GFP:Atg8 puncta disappeared

- 1 (GFP:Atg8) or randomly drawn puncta (random) (.xlsx file).
- 2
- 3 **Figure 2-source data 2.** Relates to Figure 2I. Quantification of the percentage of 20 h  
4 APF DIOMs with more than 5  $\mu\text{m}$  GFP:Stx17-positive tubules in control, *Spin* RNAi,  
5 *TRPML* RNAi, or *Vha68-3* RNAi (.xlsx file).
- 6
- 7 **Figure 2-source data 3.** Relates to Figure 2–figure supplement 2C. Quantification of  
8 Spin:RFP-positive tubules in *shibire* temperature-sensitive mutant at 19°C all the time  
9 or 29°C from P4 to P5 stage (.xlsx file).
- 10
- 11 **Figure 2-source data 4.** Relates to Figure 2–figure supplement 3B. Quantification of  
12 the aspect ratio of DIOMs at 4 d APF of control, *Tor* RNAi, or *Rheb* RNAi (.xlsx file).
- 13
- 14 **Figure 2-source data 5.** Relates to Figure 2–figure supplement 3D. Quantification of  
15 the percentage of 20 h APF DIOMs with more than 5  $\mu\text{m}$  Spin:RFP-positive tubules in  
16 control, *Tor* RNAi, or *Rheb* RNAi (.xlsx file).
- 17
- 18 **Figure 2-source data 6.** Relates to Figure 2–figure supplement 3F. Quantification of  
19 the aspect ratio of DIOMs at 4 d APF of control, *Tsc1* RNAi, or *Rheb* O/E (.xlsx file).
- 20
- 21 **Figure 2-source data 7.** Relates to Figure 2–figure supplement 3H. Quantification of  
22 the percentage of 20 h APF DIOMs with more than 5  $\mu\text{m}$  Spin:RFP-positive tubules in  
23 control, *Tsc1* RNAi, or *Rheb* O/E (.xlsx file).
- 24
- 25 **Figure 3-source data 1.** Relates to Figure 3B. Quantification of the percentage of 20 h  
26 APF DIOMs with more than 5  $\mu\text{m}$  Spin:RFP-positive tubules in *ATG* RNAi conditions  
27 (.xlsx file).
- 28
- 29 **Figure 3-source data 2.** Relates to Figure 3F. Quantification of the percentage of 20 h  
30 APF DIOMs with more than 5  $\mu\text{m}$  Spin:RFP-positive tubules in control or *Atg9* null  
31 (.xlsx file).
- 32
- 33 **Figure 3-source data 3.** Relates to Figure 3H. Quantification of the percentage of 20 h

1 APF DIOMs with more than 5  $\mu\text{m}$  Spin:RFP-positive tubules in control or *Stx17* null  
2 (.xlsx file).

3

4 **Figure 3-source data 4.** Relates to Figure 3J. Quantification of the percentage of 20 h  
5 APF DIOMs with more than 5  $\mu\text{m}$  Spin:RFP-positive tubules in control, *Atg5* null, or  
6 combination of *Atg5* null and *Stx17* RNAi (.xlsx file).

7

8 **Figure 3-source data 5.** Relates to Figure 3L. Quantification of the diameter of  
9 mCherry:GFP:Stx17-positive vesicles in co-RNAi of *Spin* and *Atg18* or *Vps39* (.xlsx  
10 file).

11

12 **Figure 3-source data 6.** Relates to Figure 3–figure supplement 1B. Quantification of  
13 the percentage of 20 h APF DIOMs with more than 5  $\mu\text{m}$  mCh:Stx17-positive tubules in  
14 *ATG* RNAi conditions (.xlsx file).

15

16 **Figure 3-source data 7.** Relates to Figure 3–figure supplement 1D. Quantification of  
17 the percentage of DIOMs with more than 5  $\mu\text{m}$  mCh:Stx17-positive tubules in control  
18 or *Atg9* null (.xlsx file).

19

20 **Figure 3-source data 8.** Relates to Figure 3–figure supplement 1E. Quantification of  
21 the percentage of 20 h APF DIOMs with more than 5  $\mu\text{m}$  mCh:Stx17-positive tubules in  
22 control or *Atg5* null (.xlsx file).

23

24 **Figure 5-source data 1.** Relates to Figure 5B. Quantification of the aspect ratio of  
25 DIOMs at 4 d APF in *ATG* RNAi conditions (.xlsx file).

26

27 **Figure 5-source data 2.** Relates to Figure 5D. Quantification of the DIOM phenotypes  
28 at 4d APF in control, *Atg5* null, or *Atg9* null DIOMs (.xlsx file).

29

30 **Figure 6-source data 1.** Relates to Figure 6E. Quantification of the recovery of  
31 Cp1:mKO intensity after the bleaching (.xlsx file).

32

33 **Figure 7-source data 1.** Relates to Figure 7B. Quantification of the intensity of

- 1 LysoTracker-positive objects in 12 or 24 h APF DIOMs (.xlsx file).
- 2
- 3 **Figure 7-source data 2.** Relates to Figure 7D. Quantification of the intensity of DQ
- 4 Red-BSA-positive objects in 12 or 24 h APF DIOMs (.xlsx file).

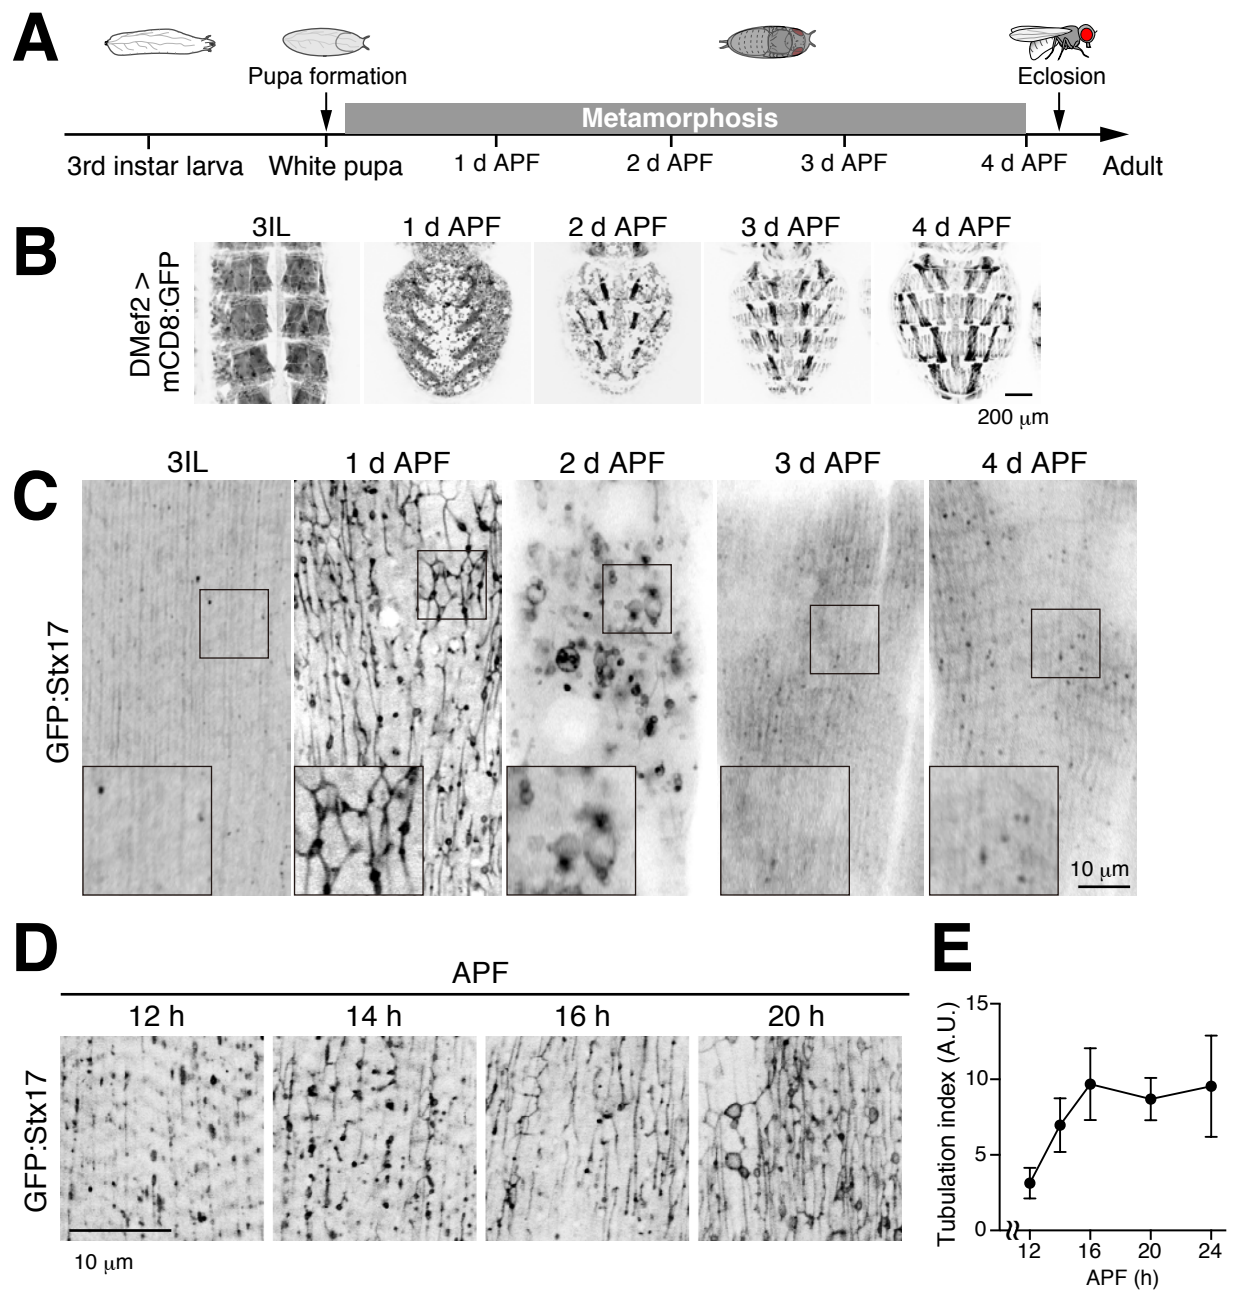

**Figure 1**

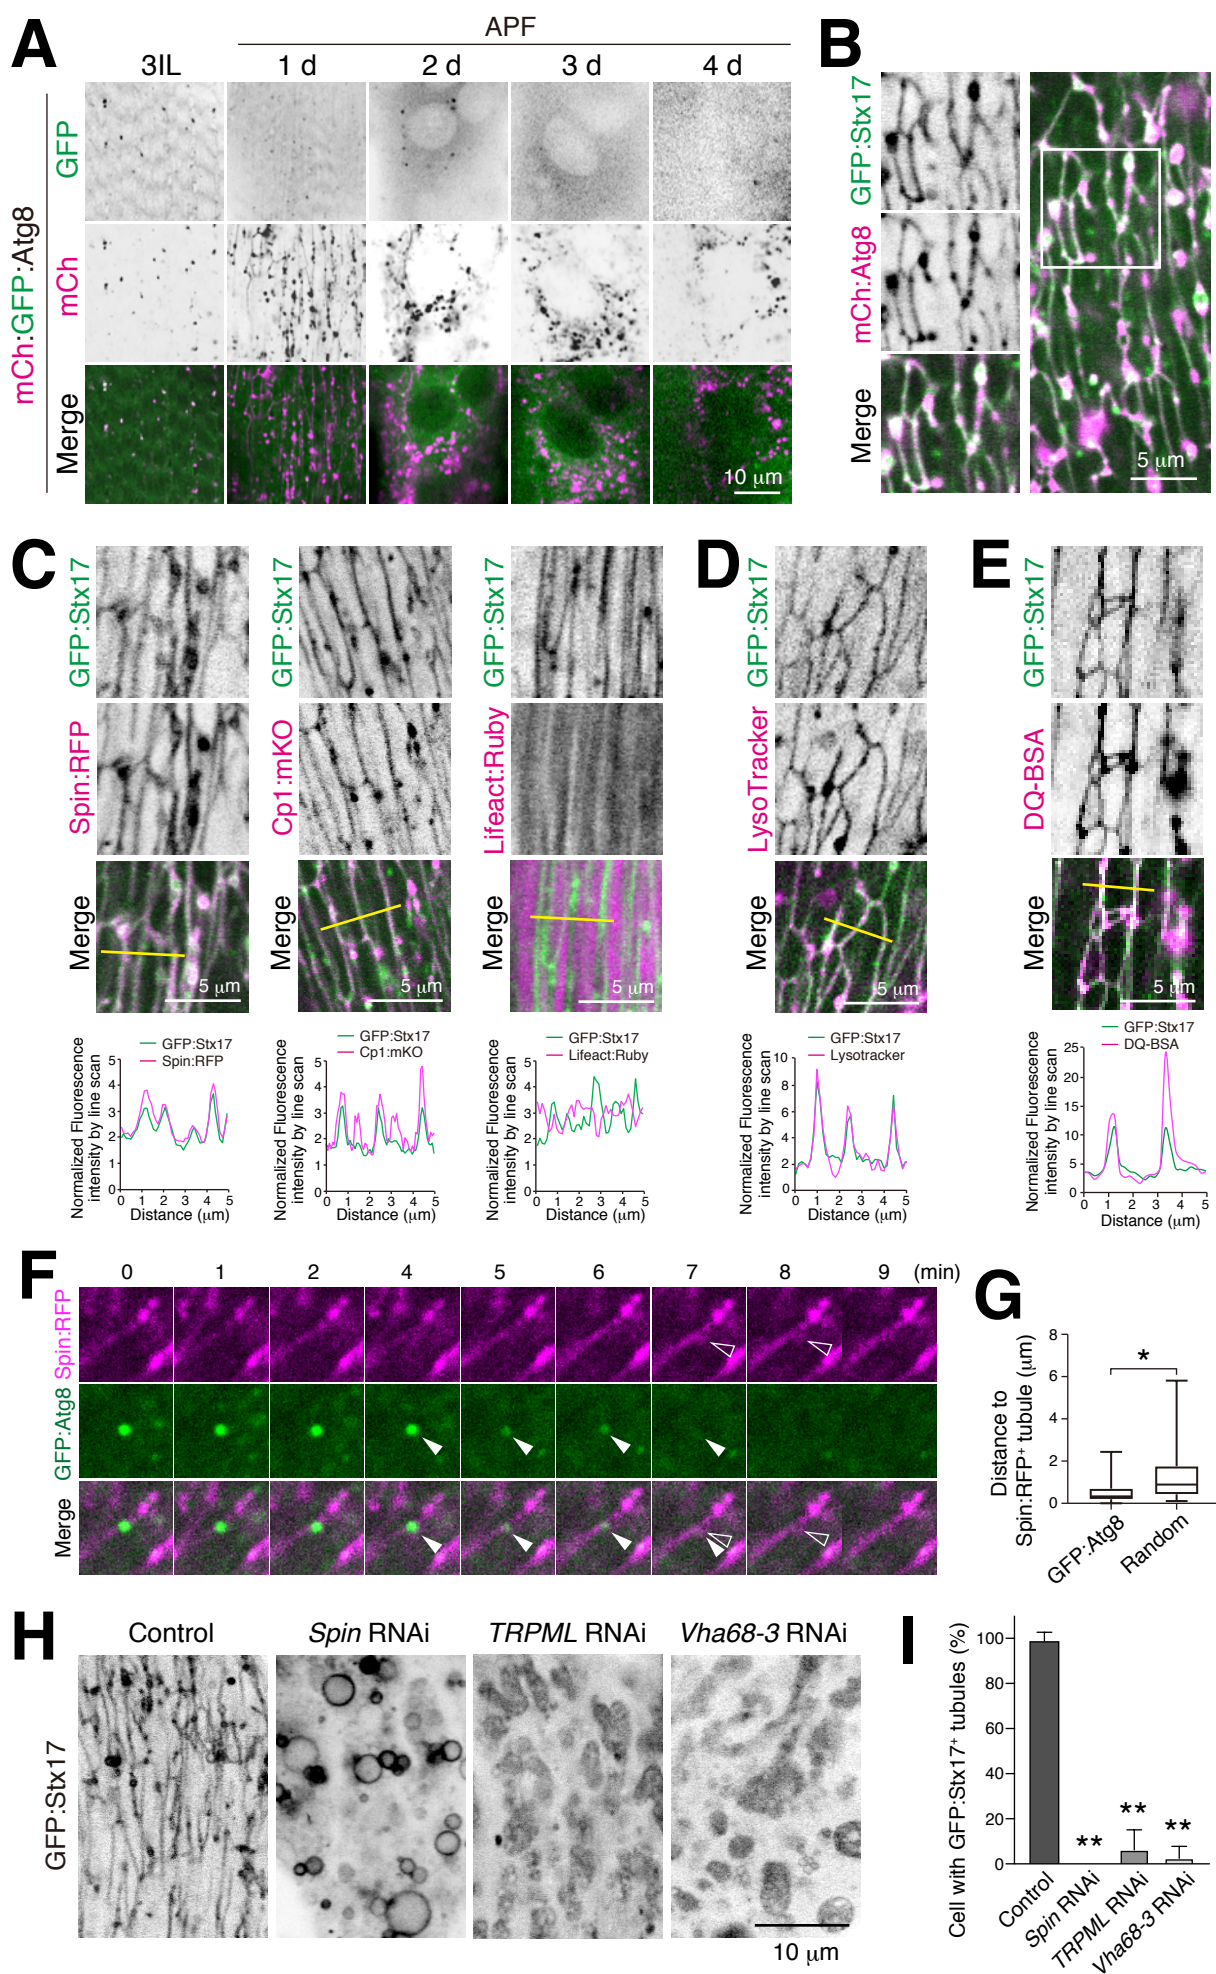

**Figure 2**

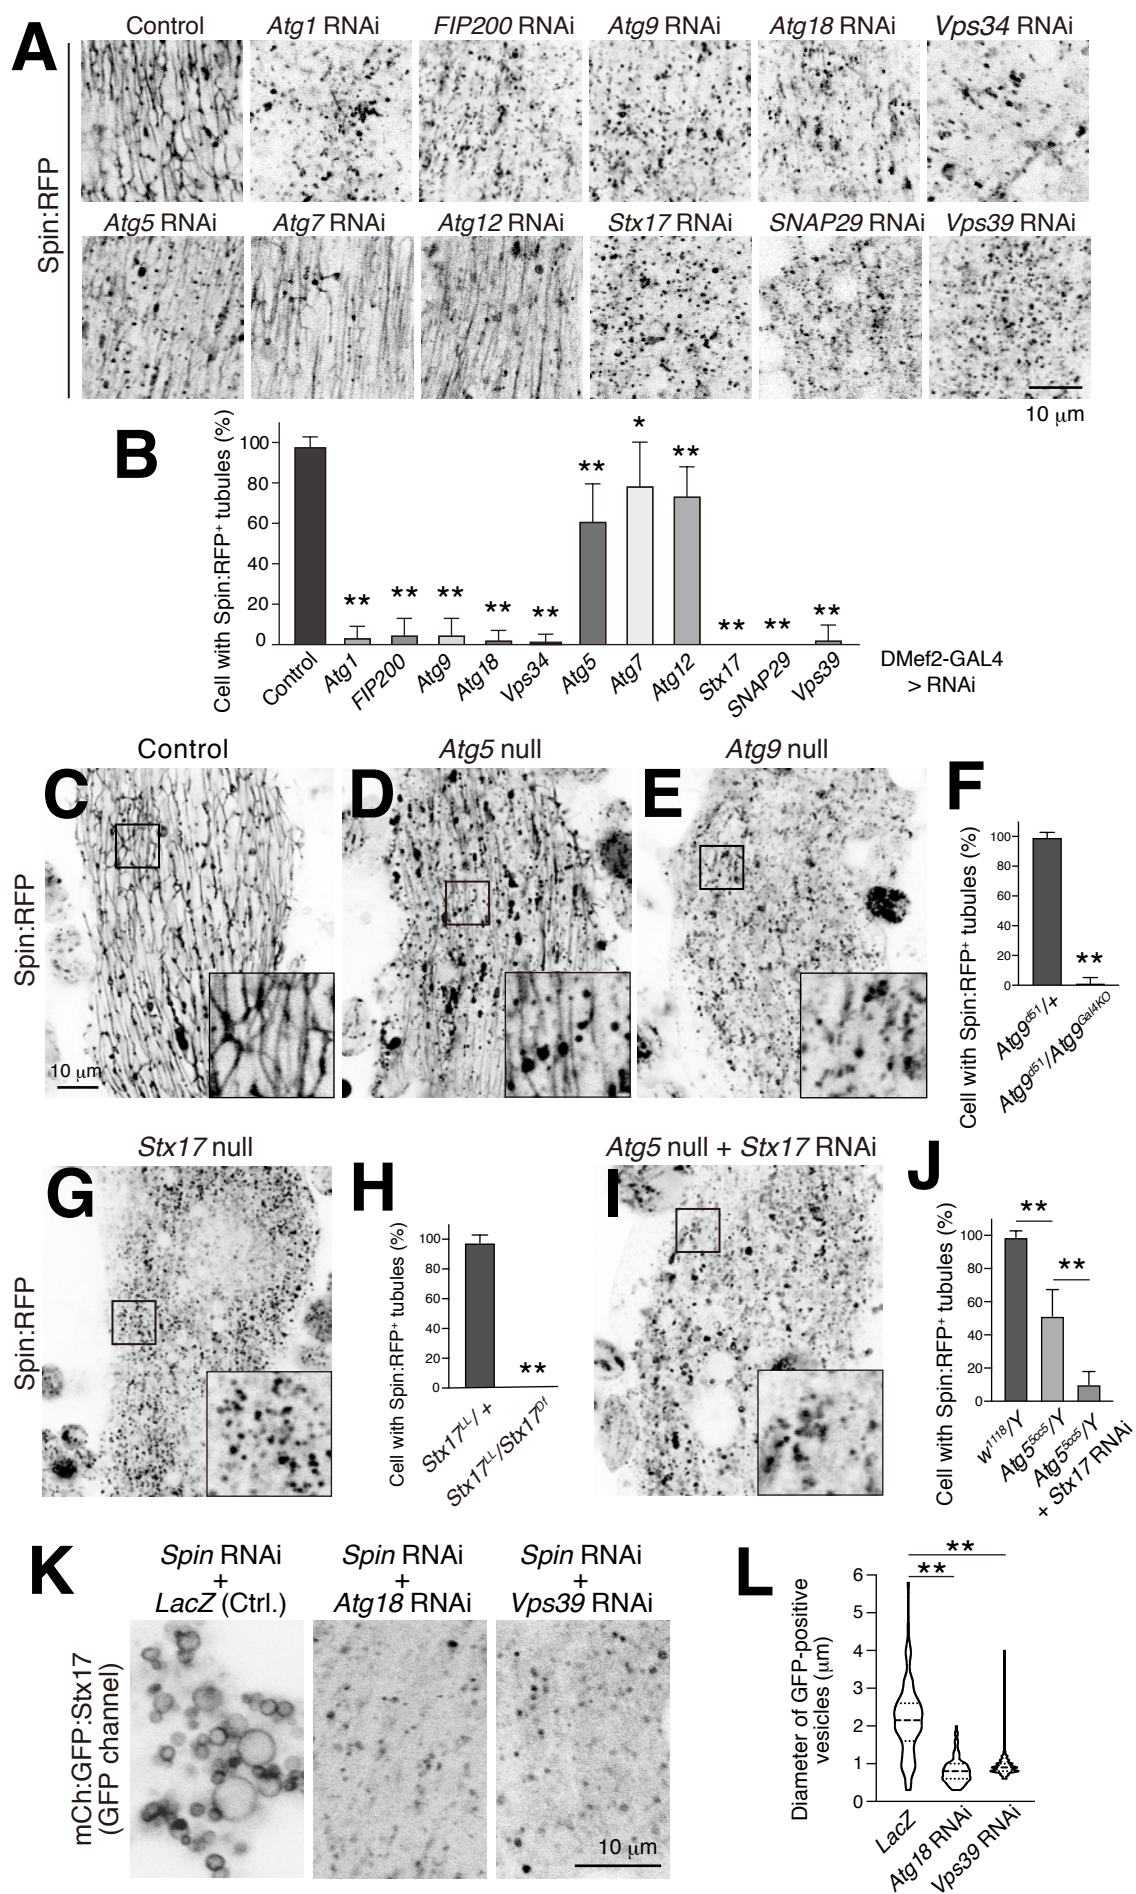

**Figure 3**

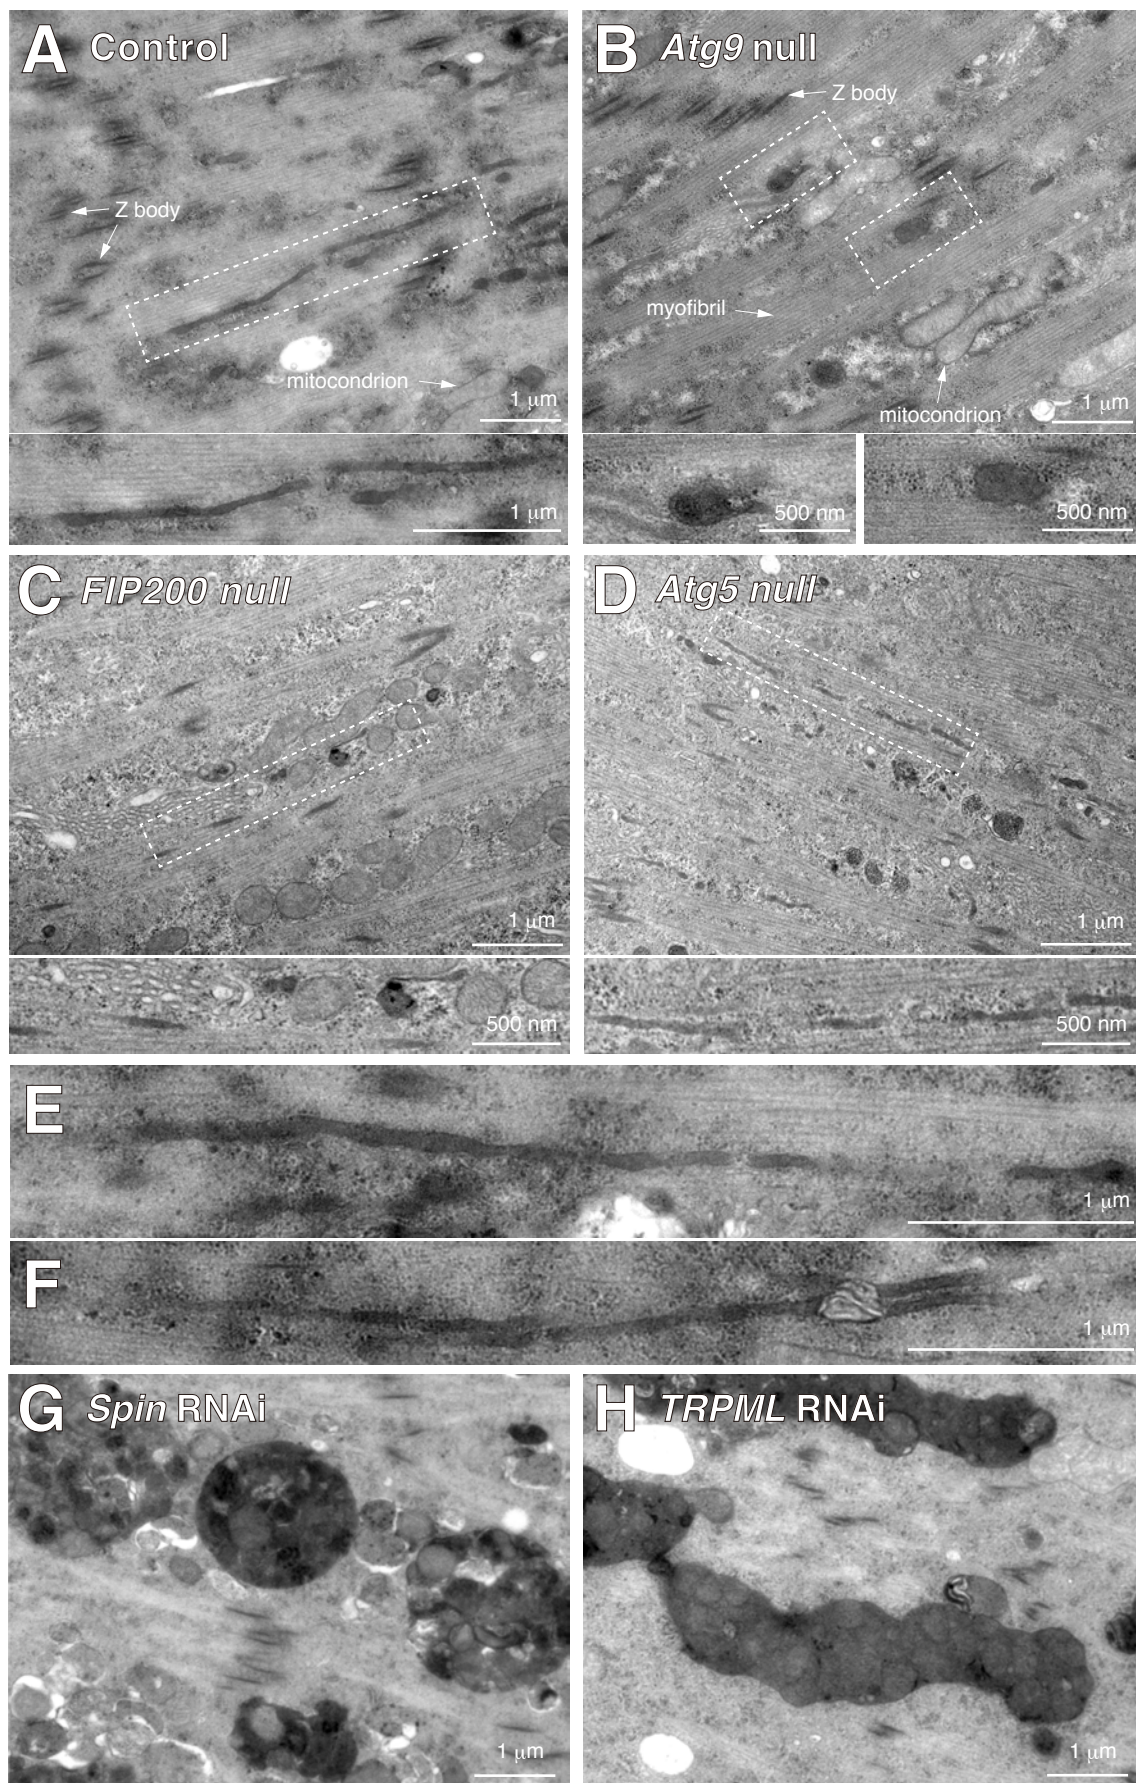

**Figure 4**



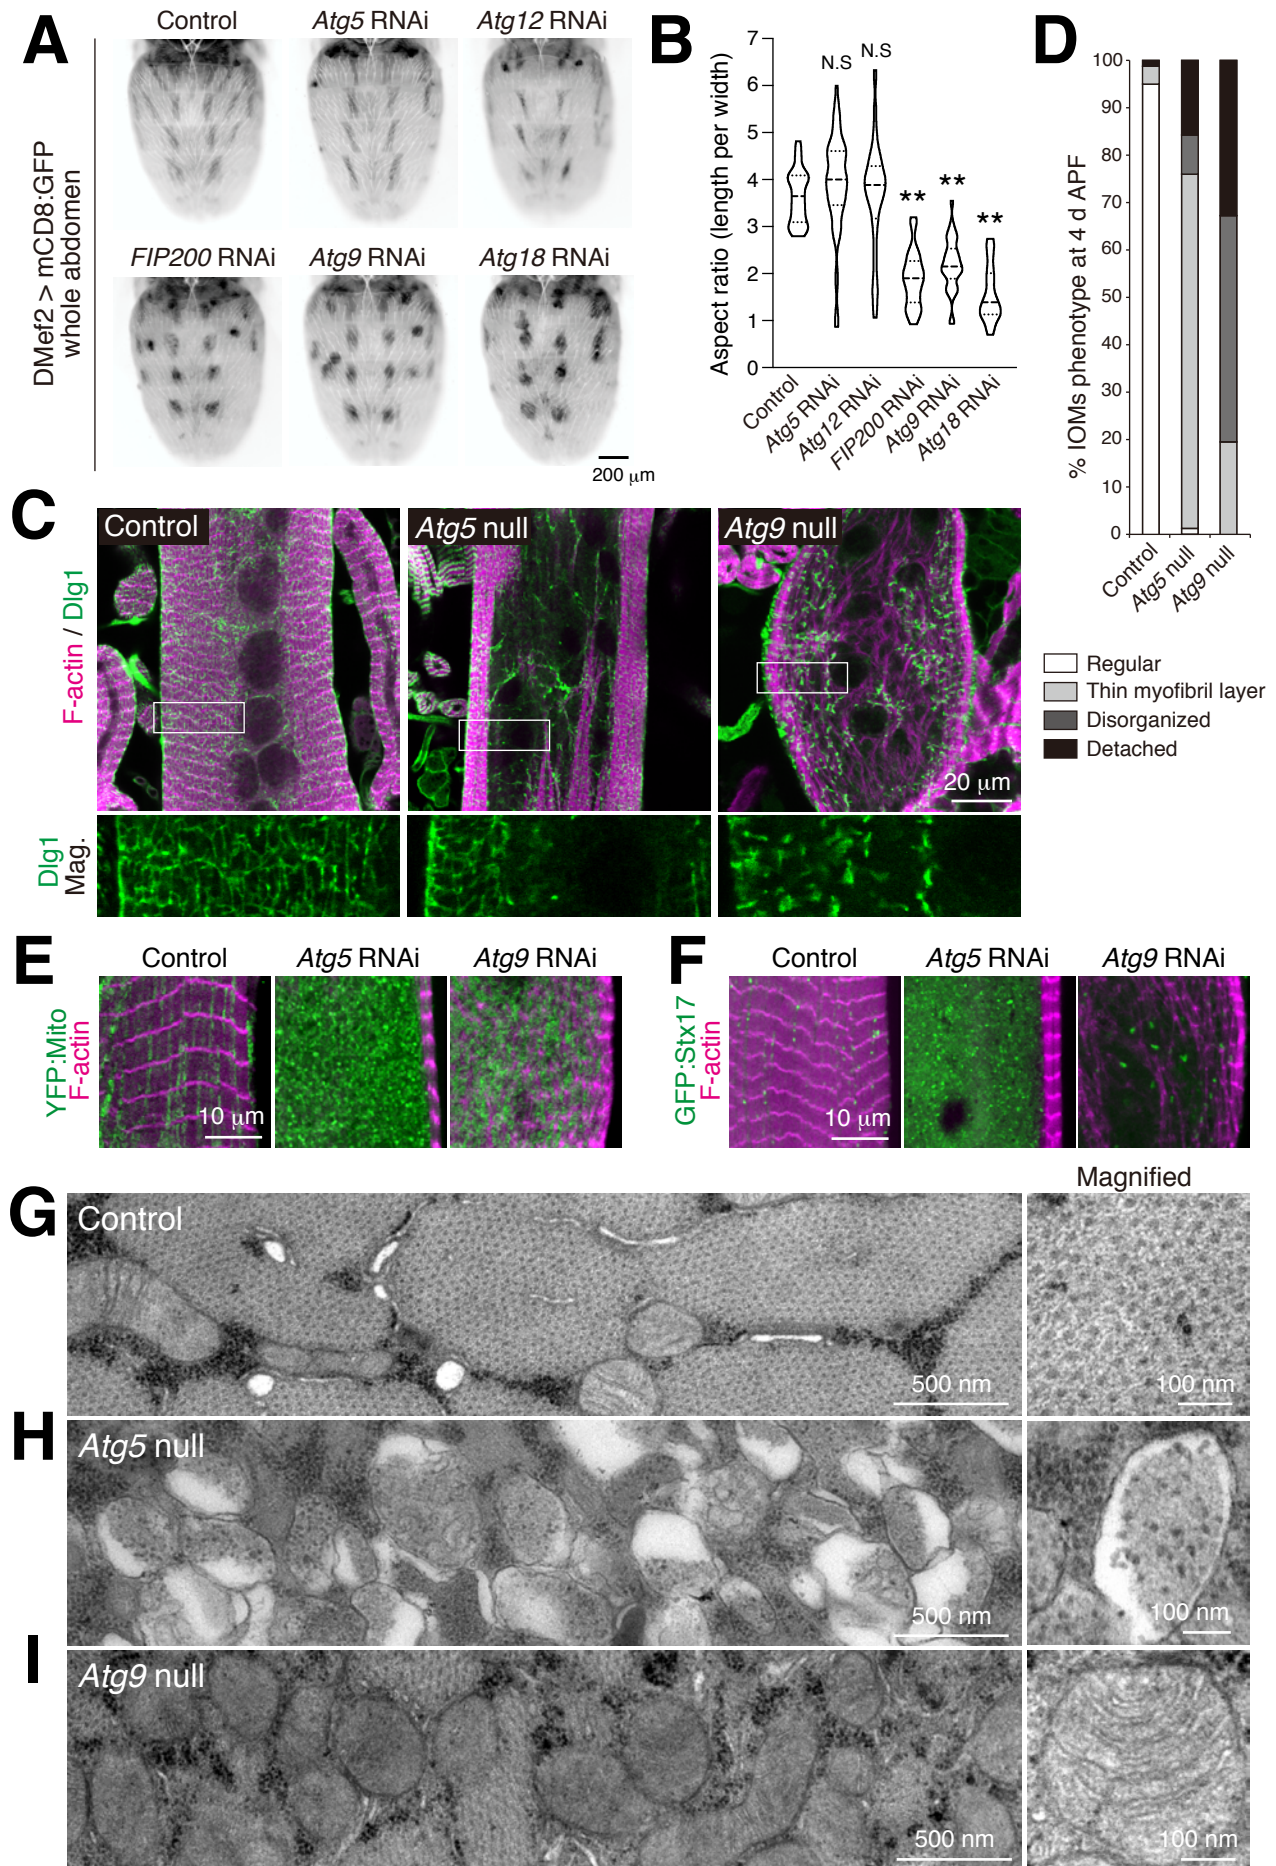

**Figure 5**

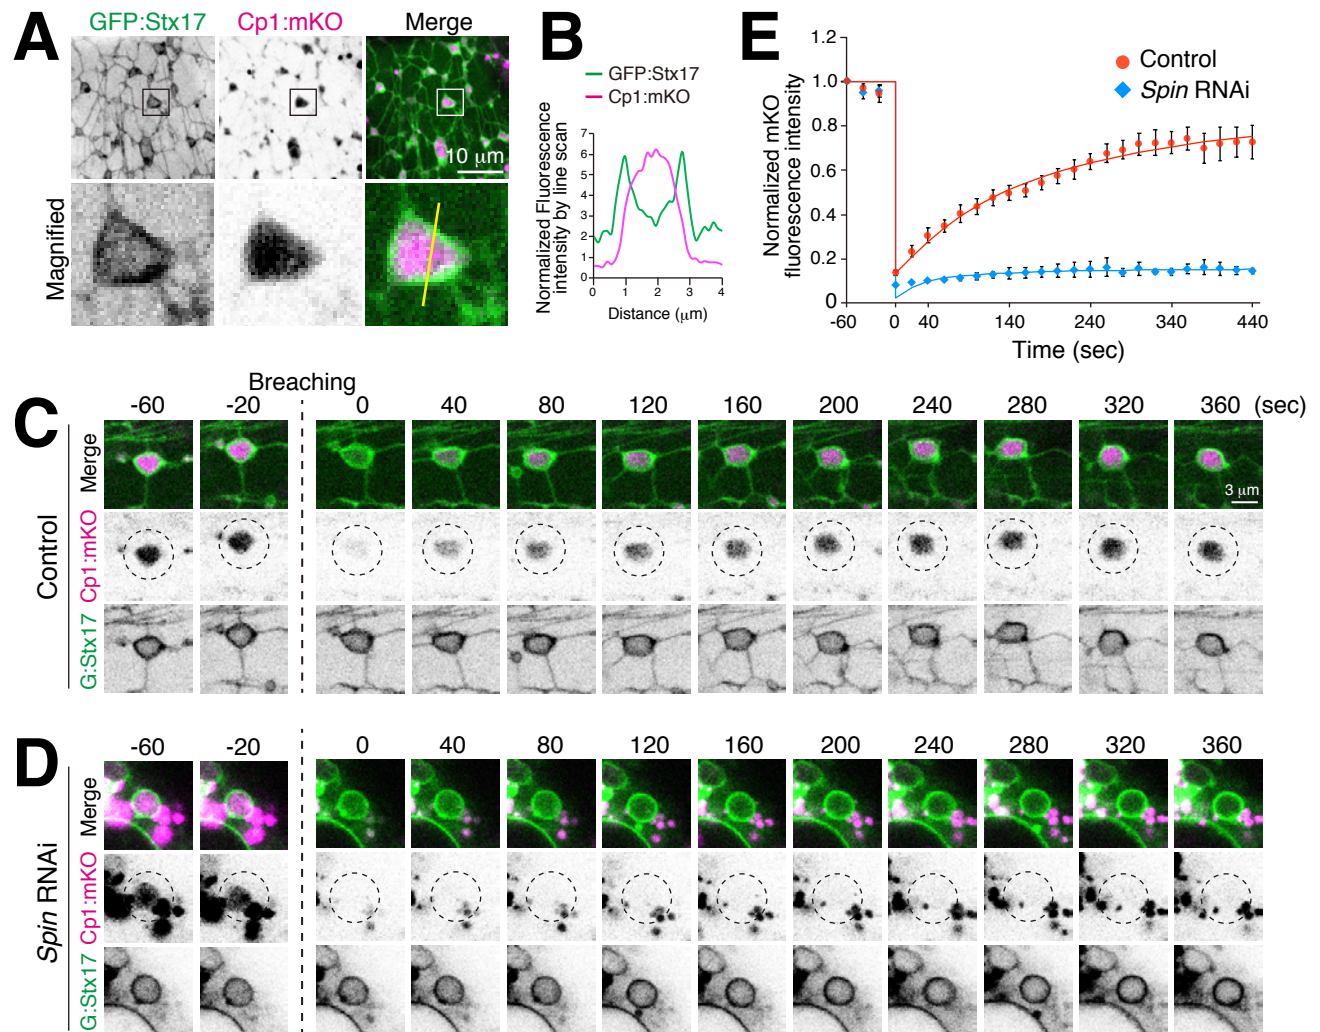

Figure 6

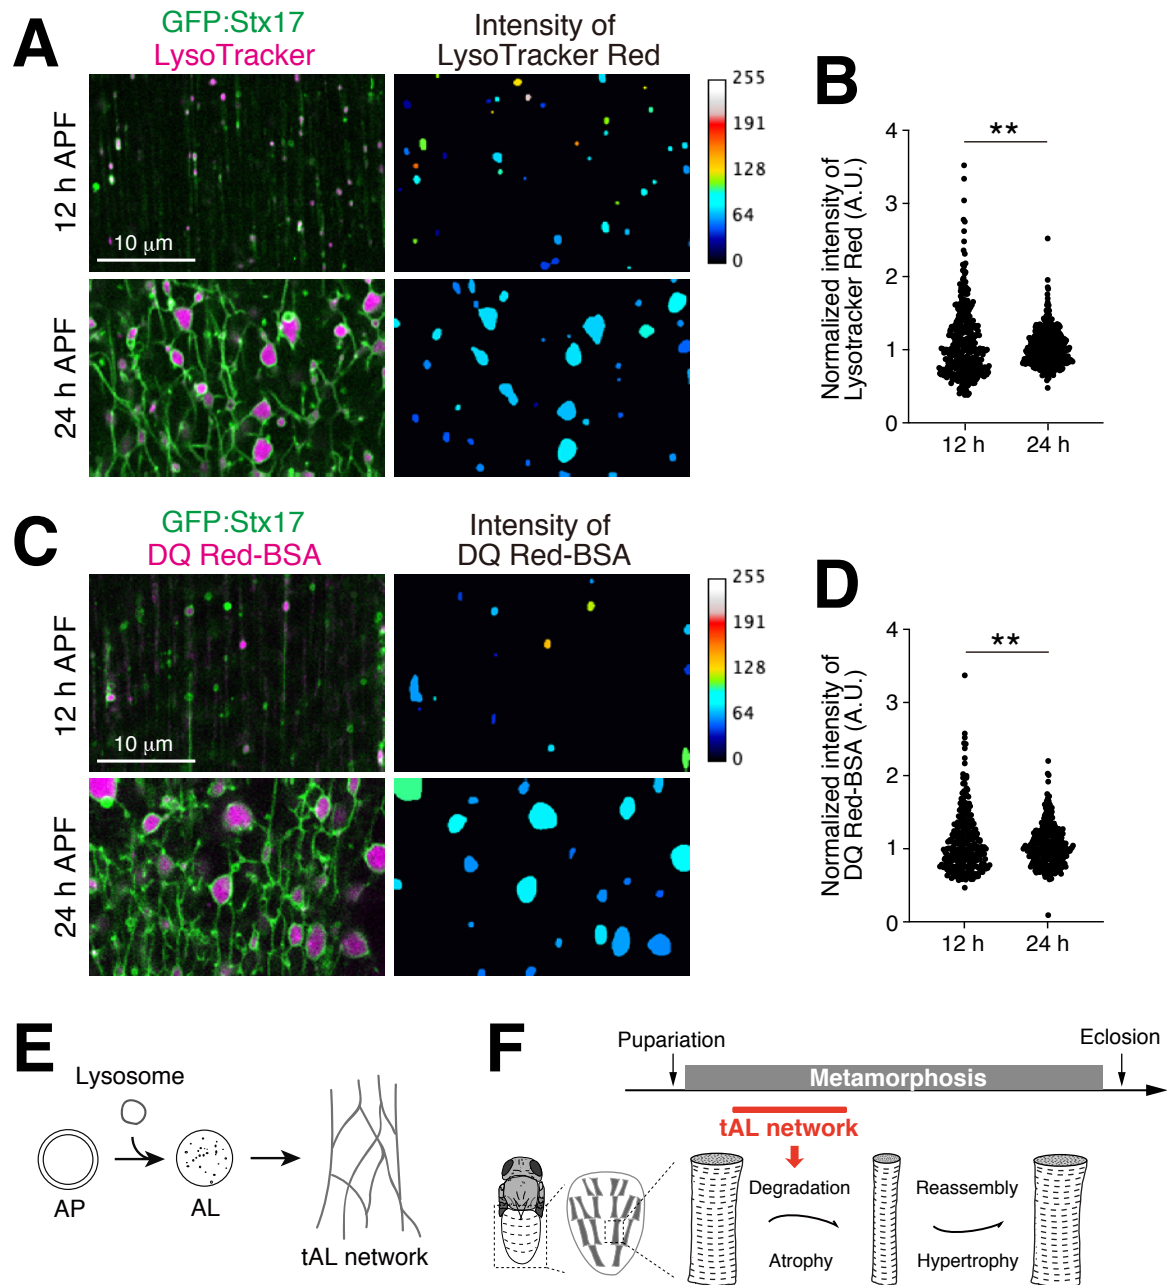

**Figure 7**

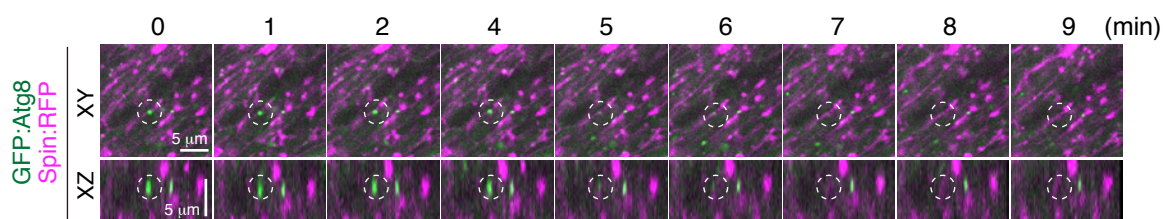

**Figure 2—figure supplement 1**

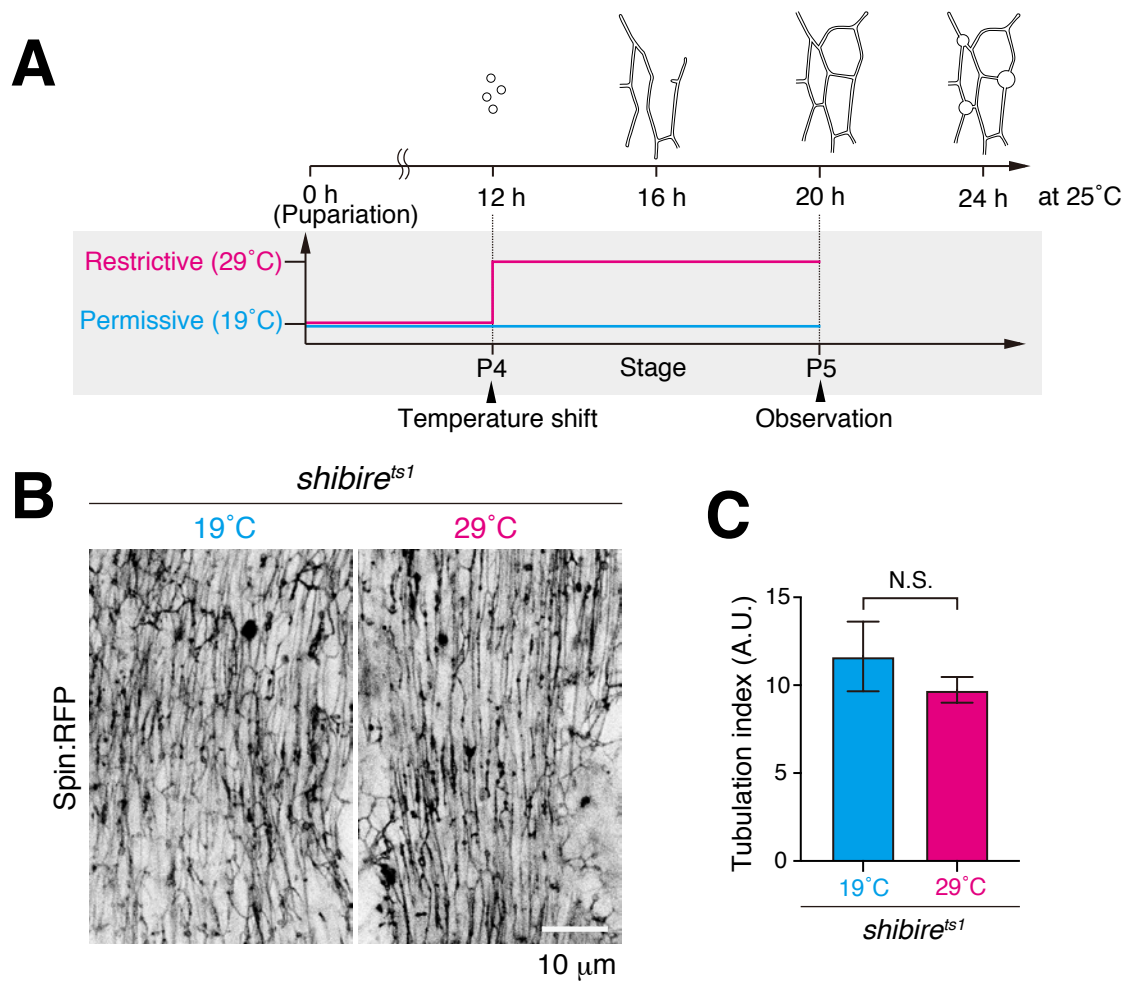

**Figure 2—figure supplement 2**

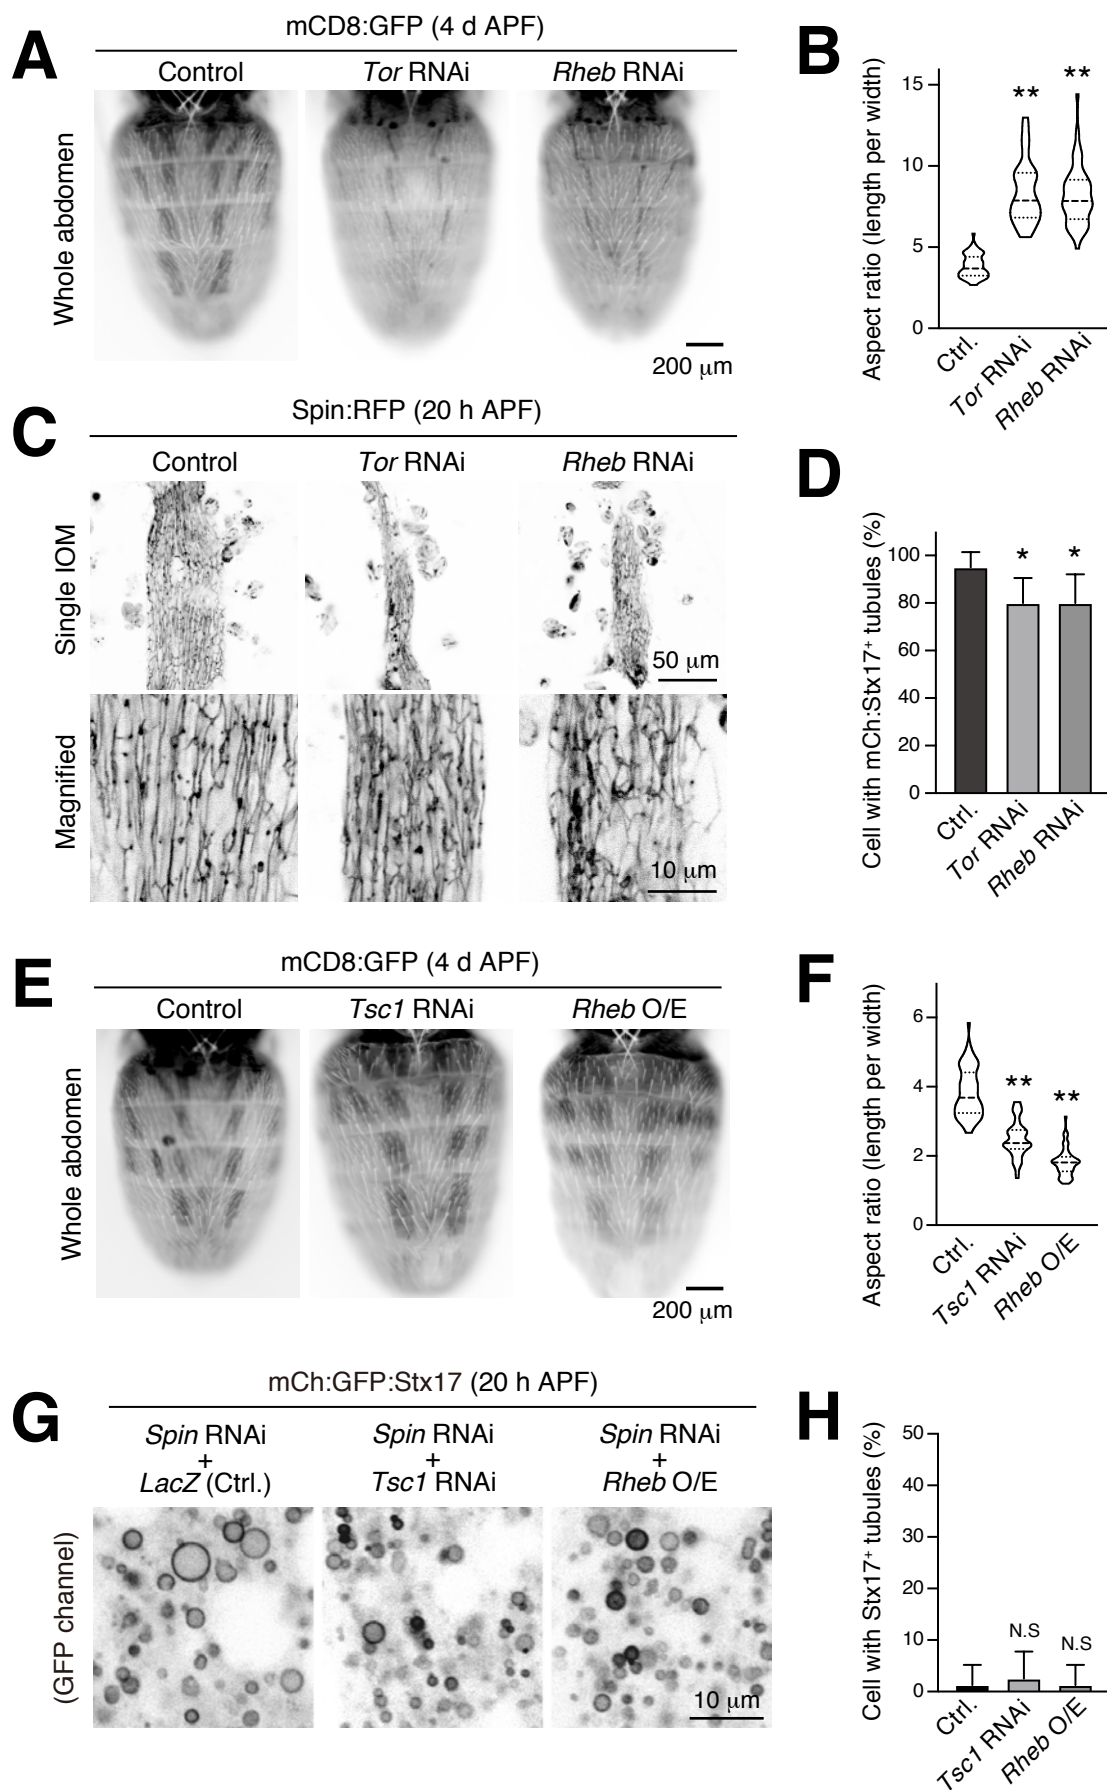

**Figure 2—figure supplement 3**

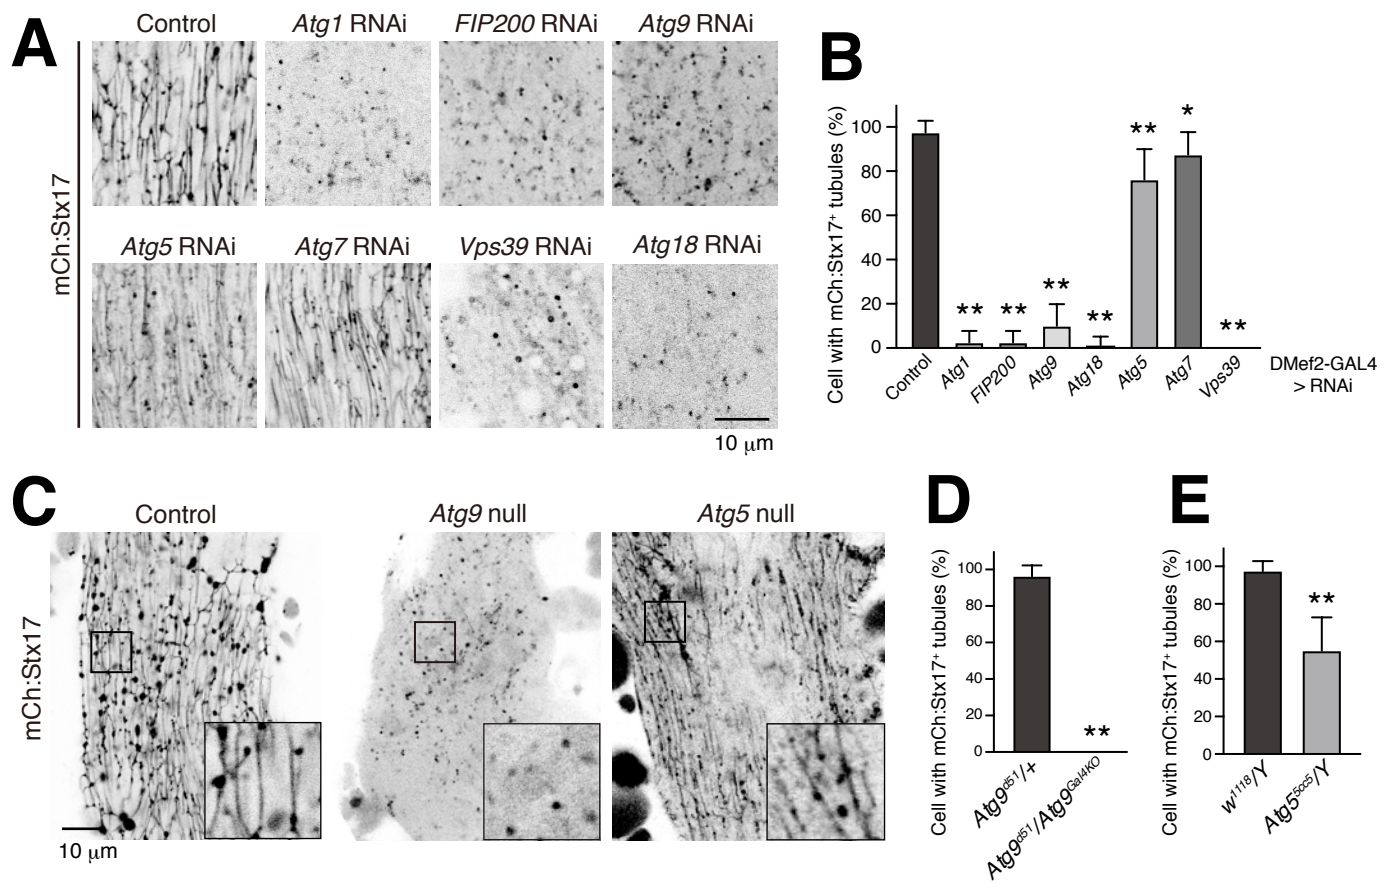

**Figure 3—figure supplement 1**

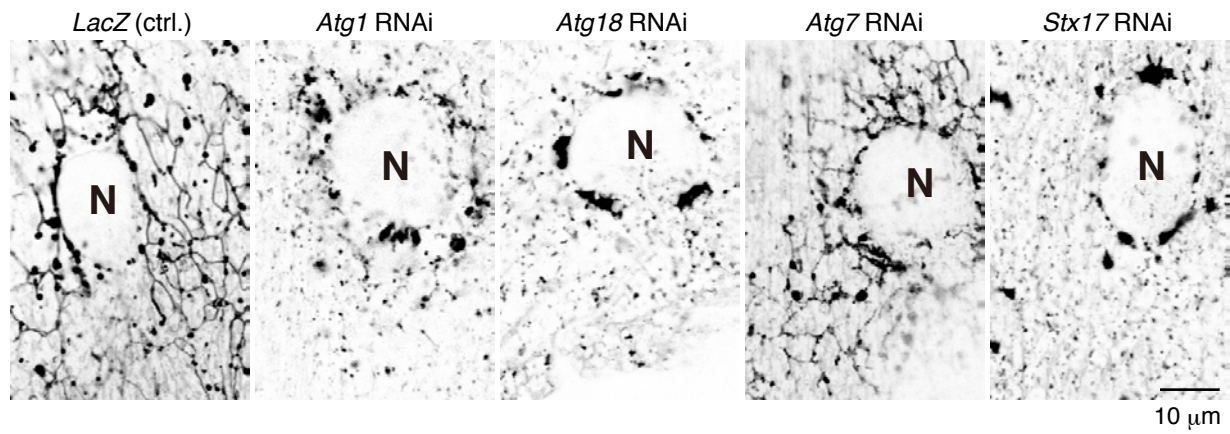

**Figure 3—figure supplement 2**



Autophagic membranes in *Atg5* null DIOMs at 1 d APF

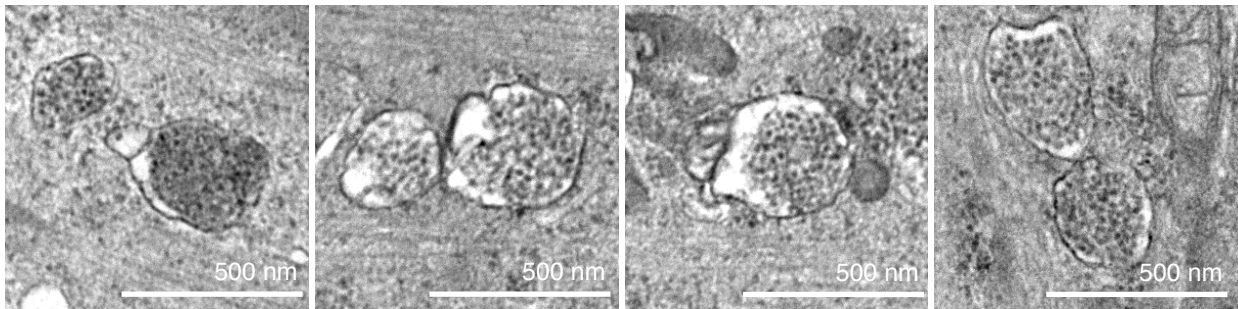

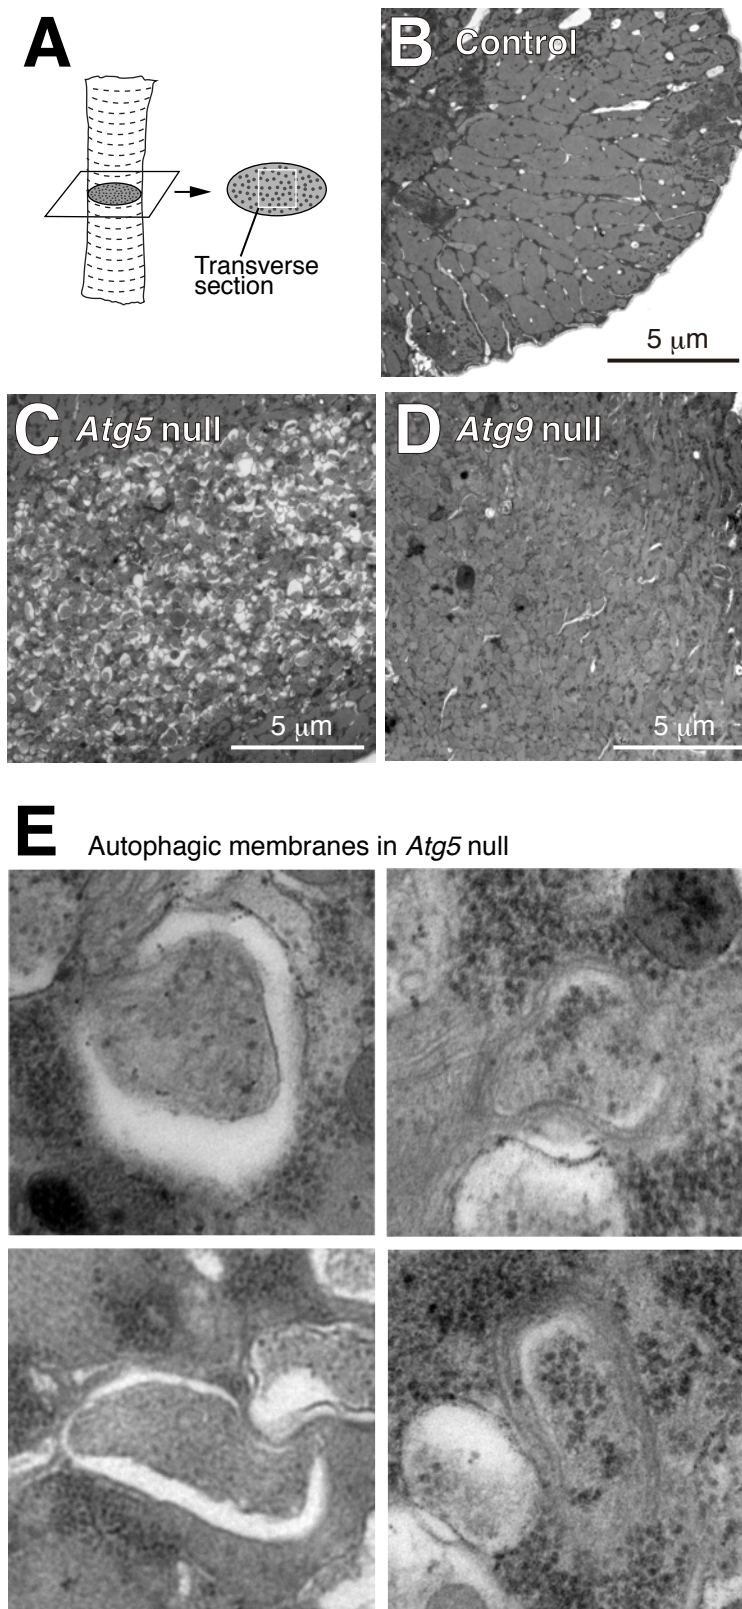

**Figure 5—figure supplement 1**

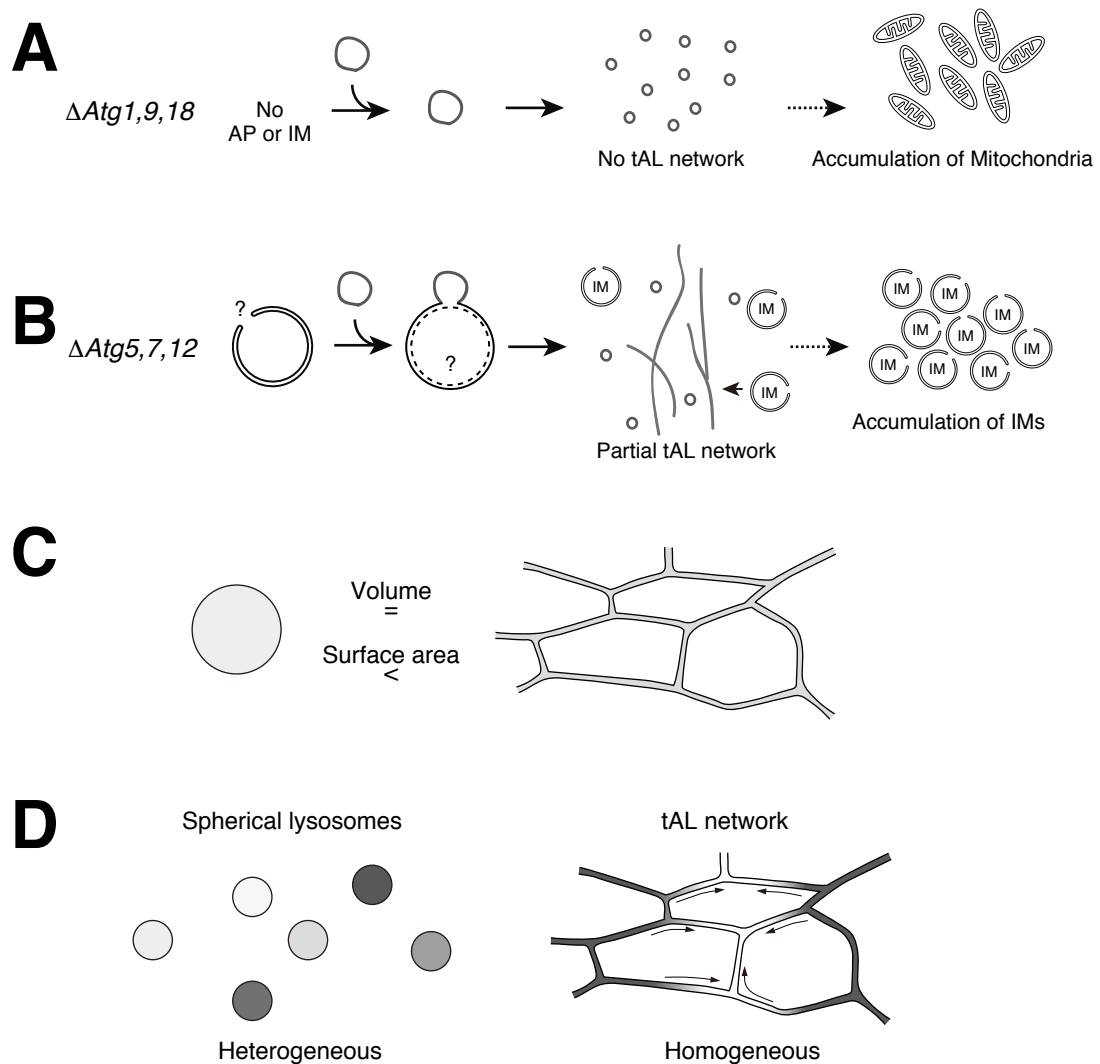

**Figure 7—figure supplement 1**
